# Supplementary material for: Suppression of Ribosomal Pausing by eIF5A Is Necessary to Maintain the Fidelity of Start Codon Selection
Source: PubMed Central journal article supplement — Cell Rep. Author manuscript; Available in PMC 2019 Dec 17. (PMC6917043; doi:10.1016/j.celrep.2019.10.129), 2019-12-03
Supplement: NIHMS1545830-supplement-1.pdf [file NIHMS1545830-supplement-1.pdf]

**Cell Reports, Volume 29**

**Supplemental Information**

**Suppression of Ribosomal Pausing  
by eIF5A Is Necessary to Maintain  
the Fidelity of Start Codon Selection**

**Hema Manjunath, He Zhang, Frederick Rehfeld, Jaeil Han, Tsung-Cheng Chang, and Joshua T. Mendell**

**A**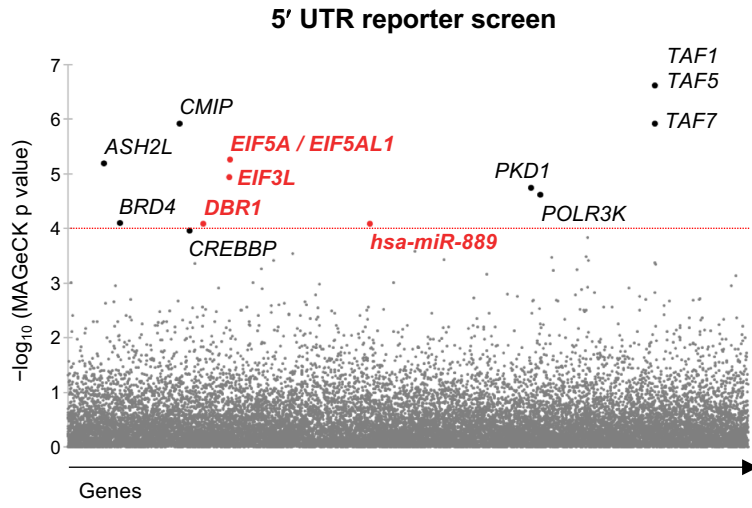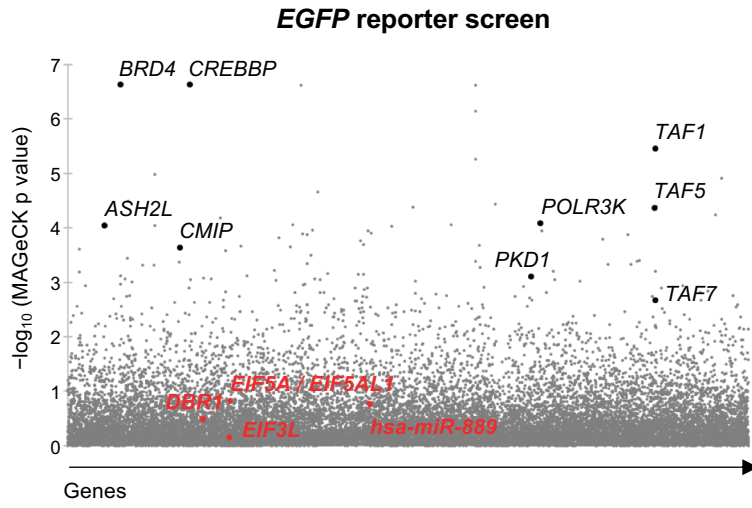**B**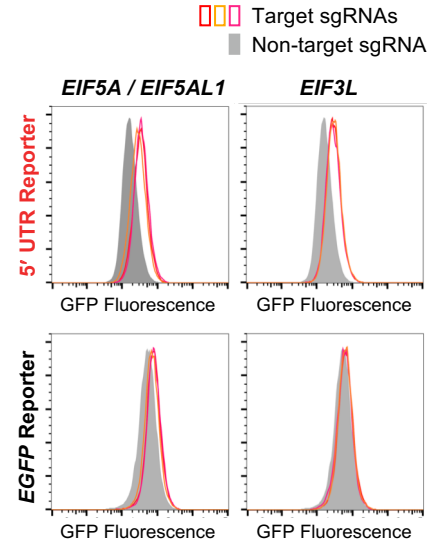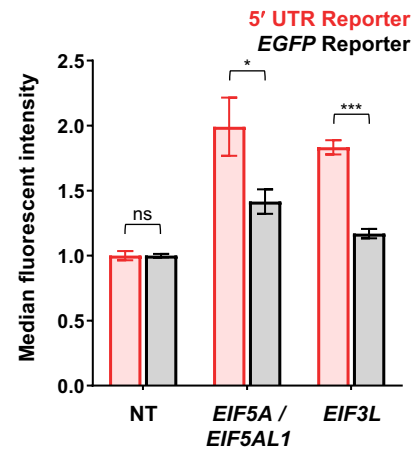**C**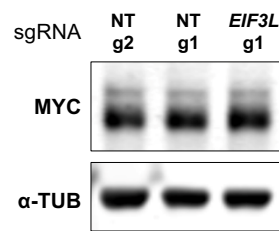**D**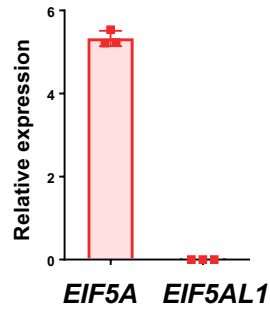**E**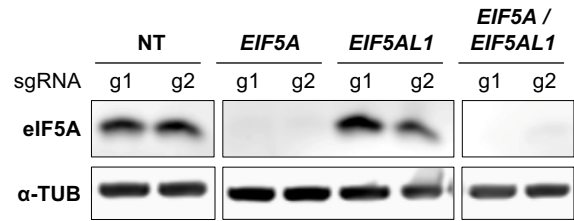**F**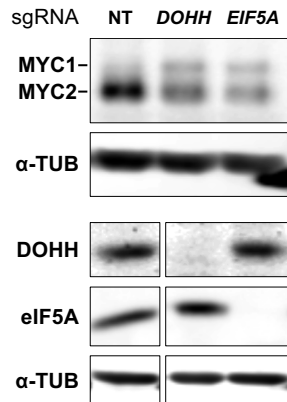

**Figure S1. Analysis and validation of CRISPR/Cas9 screening data, Related to Figure 1**

(A) MAGeCK analysis of screening data from *MYC* 5' UTR reporter cells (top) and *EGFP* control reporter cells (bottom). 5' UTR-specific hits marked in red, common hits marked in black.

(B) 5' UTR and *EGFP* control reporter expression assessed by flow cytometry after lentiviral delivery of Cas9 and individual sgRNAs targeting *EIF5A/EIF5AL* or *EIF3*.

(C) Western blot analysis of *MYC* protein levels in HCT116 cells after lentiviral delivery of Cas9 and non-target (NT) or *EIF3L*-targeting sgRNAs.

(D) qRT-PCR analysis of *EIF5A* and *EIF5AL1* expression, normalized to 18s rRNA, in HCT116 cells. n = 3 biological replicates.

(E) Western blot analysis of eIF5A protein levels in HCT116 cells after lentiviral delivery of Cas9 and sgRNAs that target only *EIF5A*, only *EIF5AL1*, or both genes.

(F) Western blot analysis of the indicated proteins in HEK293T cells after lentiviral delivery of Cas9 and sgRNAs.

Error bars represent S.D. \*p<0.05, \*\*\*p<0.001, calculated by two-tailed Welch's t-test.

**A**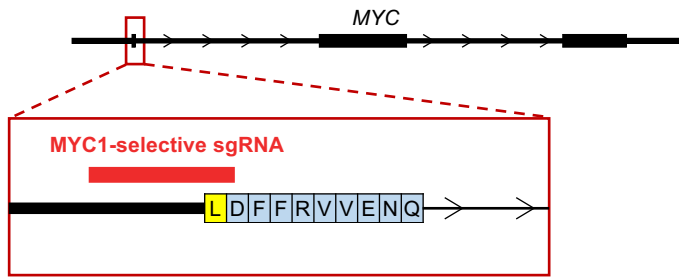**B**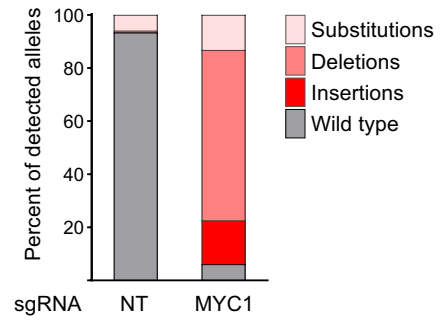**C**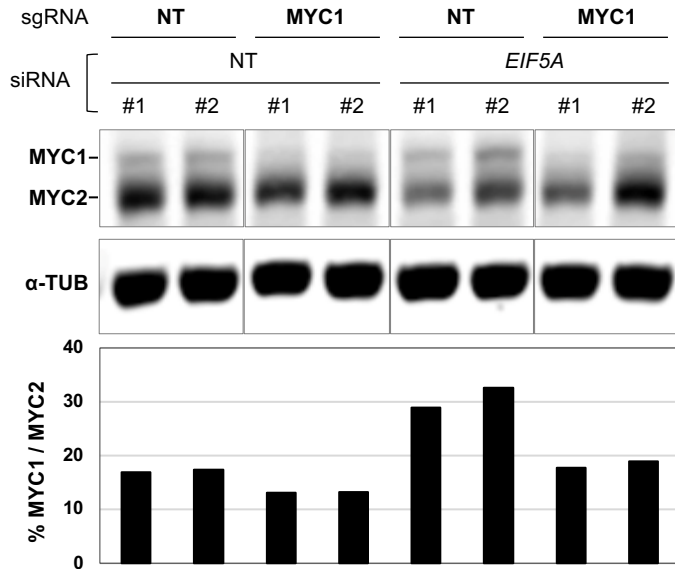**D**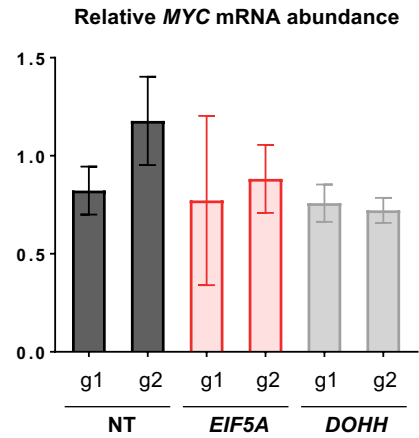**E**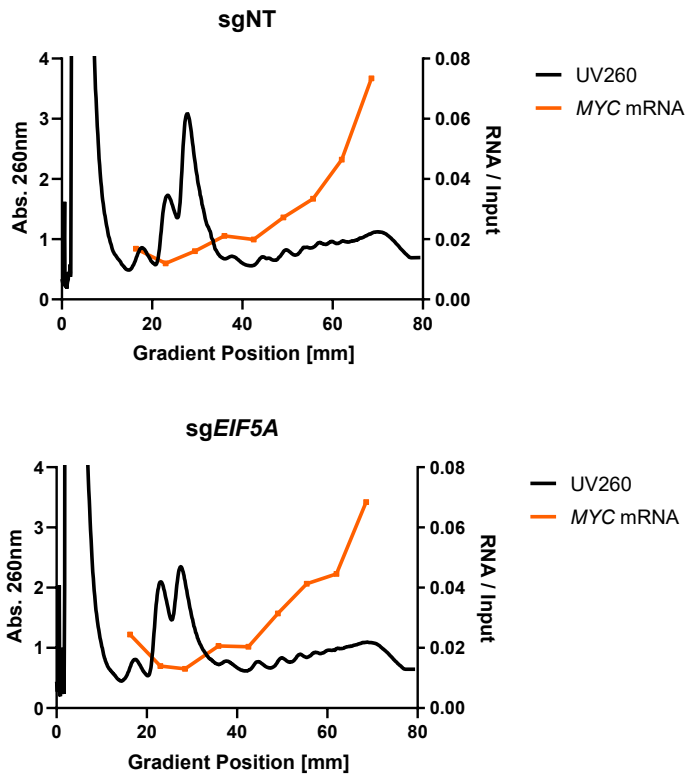**F**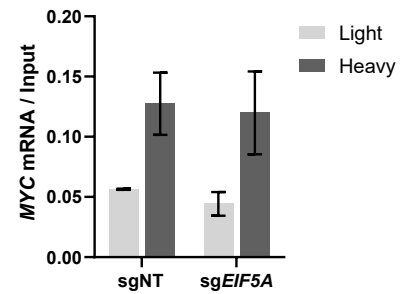**G**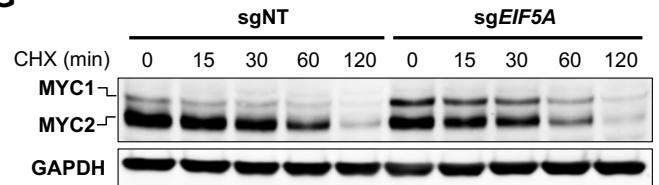

| Half-life | sgNT   | sgEIF5A |
|-----------|--------|---------|
| MYC1      | 60 min | 66 min  |
| MYC2      | 57 min | 56 min  |

## Figure S2. Additional analyses of *MYC* mRNA and protein, Related to Figure 1

(A) Schematic of the *MYC1*-targeting sgRNA.

(B) HCT116 cells were transduced with lentiviral vectors encoding Cas9 and either the *MYC1*-selective or non-targeting sgRNAs. The *MYC1* sgRNA target site was amplified and the frequency of indels in the population was determined by high throughput sequencing (>100,000 reads obtained for each condition).

(C) Western blot analysis of *MYC* protein in HCT116 cells following introduction of control or *MYC1*-targeting sgRNAs followed by transfection with control or *EIF5A*-targeting siRNAs. Quantification of *MYC1* as a percentage of *MYC2* is shown.

(D) qRT-PCR analysis of *MYC* transcript levels in *EIF5A*<sup>-/-</sup> and *DOHH*<sup>-/-</sup> HCT116 cells. Data represented as mean ± S.D. (n = 2 biological replicates per gRNA).

(E) Representative polysome association of *MYC* mRNA in HCT116 cells infected with lentivirus encoding control sgRNA (sgNT) or sgRNA targeting *EIF5A* (sg*EIF5A*). Cell lysates were separated on 5-50% linear sucrose gradients. Ultraviolet (UV) absorbance at 260 nm was measured to assess ribosome distribution along the gradient (black line). *MYC* mRNA levels in nine gradient fractions were measured by qRT-PCR and normalized to the input RNA (orange line).

(F) *MYC* mRNA association with light (sum of fractions 3-5) and heavy (sum of fractions 7-9) polysomes was not significantly altered upon *eIF5A* loss. Data represented as mean ± S.E.M. (n = 2 biological replicates per sgRNA).

(G) *MYC1* and *MYC2* protein half-lives were determined in control (sgNT) or *EIF5A* knockout (sg*EIF5A*) HCT116 cells by treating with 50 mg/mL cycloheximide (CHX) and determining protein abundance at the indicated time-points by western blotting.

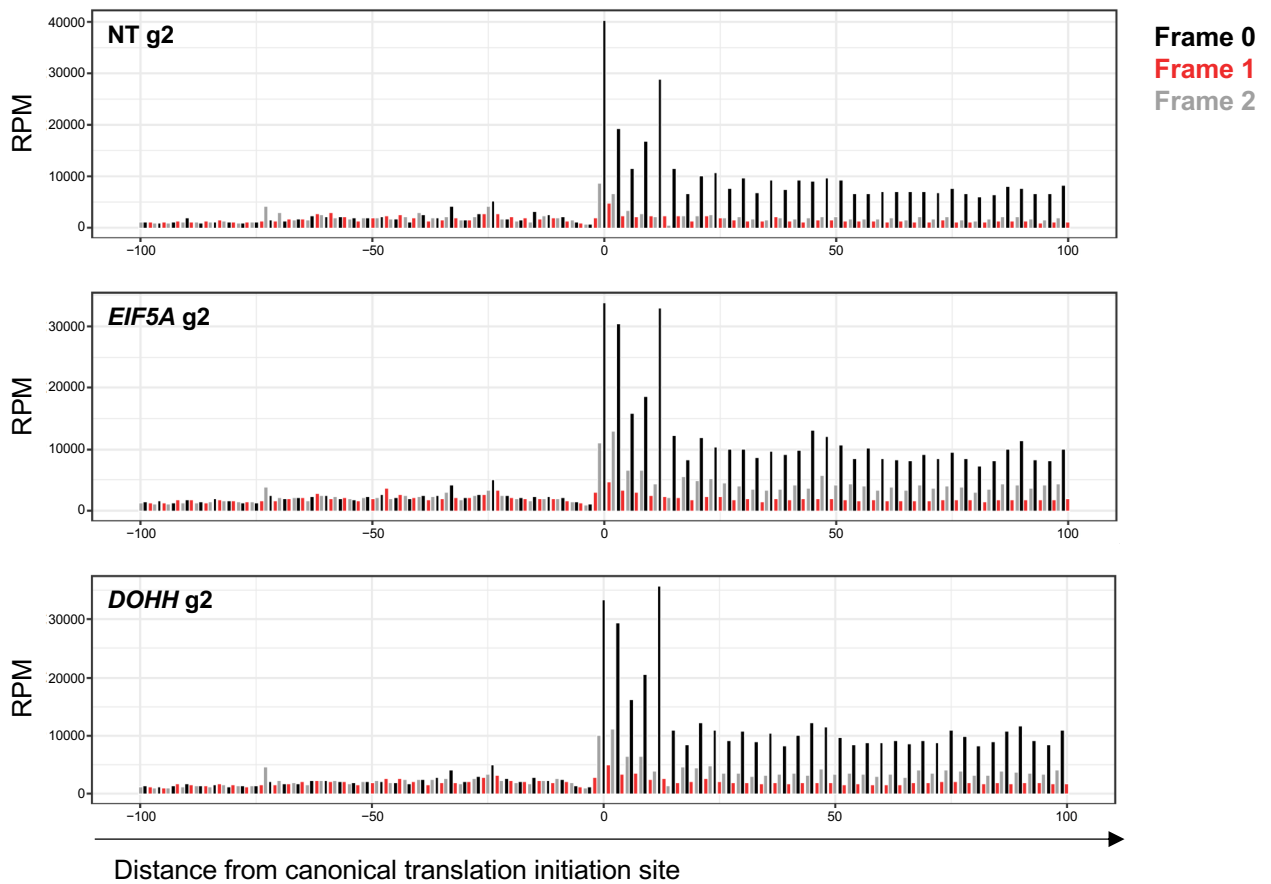

**Figure S3. Periodicity of ribosome profiling sequencing reads, Related to Figure 2**

Periodicity of ribosome profiling reads visualized by meta-codon plots centered on canonical AUG start codons. Representative samples shown.

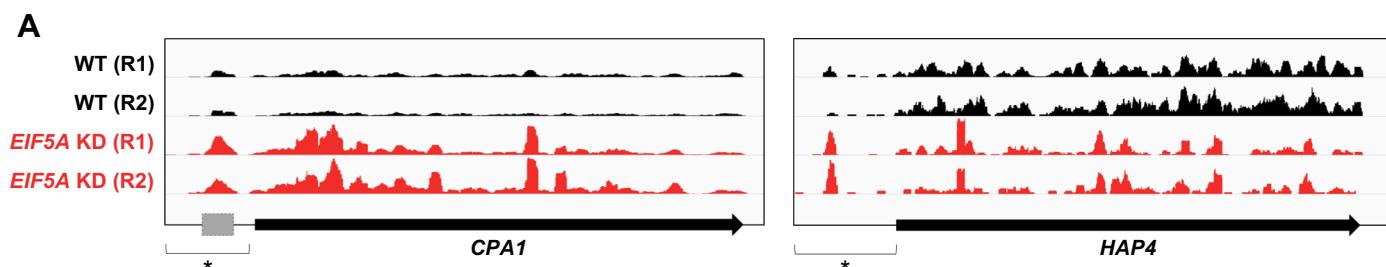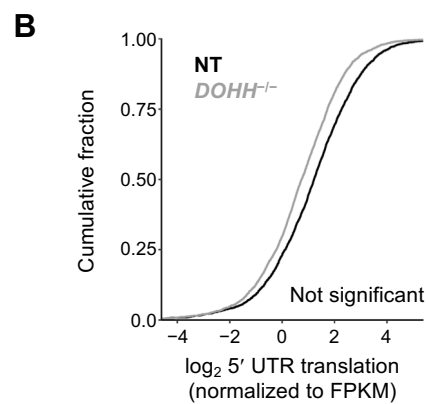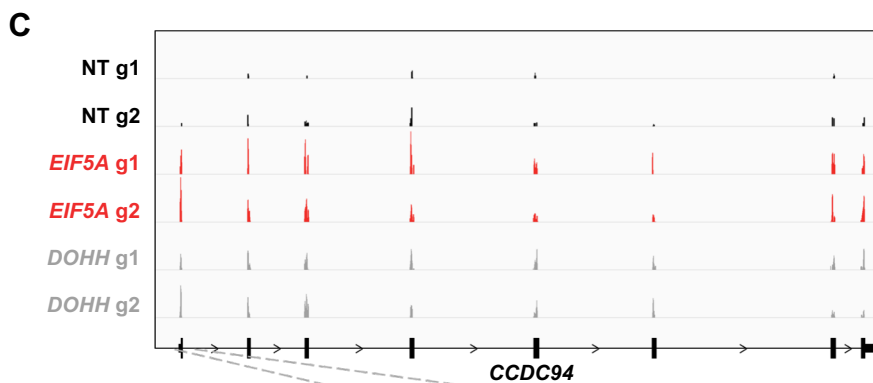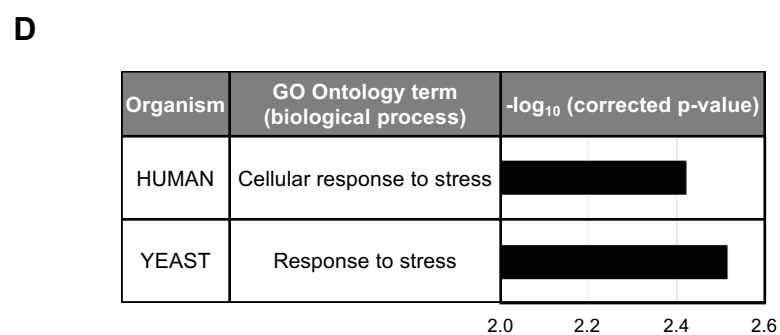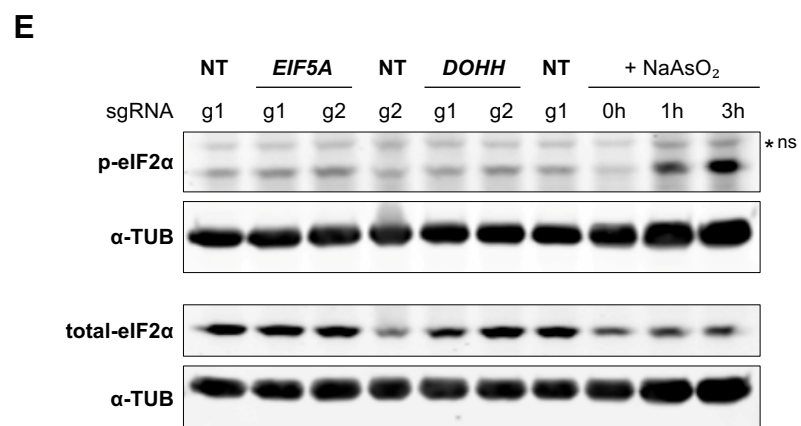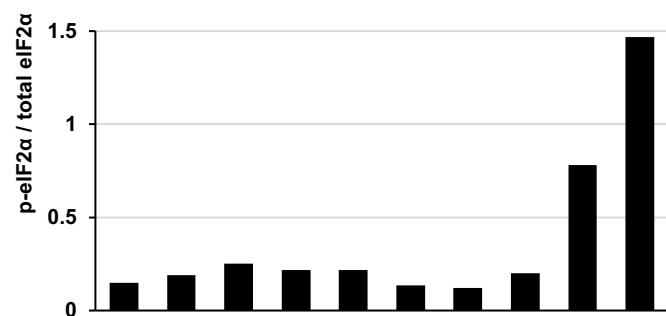

**Figure S4. Loss of function of eIF5A increases upstream translation initiation, Related to Figure 3**

(A) Ribosome occupancy on the yeast *CPA1* and *HAP4* transcripts in *EIF5A* KD and WT yeast. Region of upstream translation marked with an asterisk. Previously reported uORF in *CPA1* denoted by grey box (Zhang and Dietrich, 2005).

(B) CDF plot of 5' UTR translation in *DOHH*<sup>-/-</sup> and control sgNT HCT116 cells. 5' UTR translation defined as ribosome occupancy (RPKM) in 5' UTR normalized to transcript expression level derived from RNA-seq (FPKM) (3113 genes included based on minimal coverage criteria).

(C) Ribosome occupancy on the human *CCDC94* transcript in *EIF5A*<sup>-/-</sup>, *DOHH*<sup>-/-</sup>, and control sgNT cells. Region of upstream translation marked with an asterisk.

(D) Enrichment of stress response genes among transcripts that show increased 5' UTR translation in eIF5A-deficient human and yeast cells. Human gene ontology (GO) analysis performed with the DAVID functional annotation tool (Huang et al., 2008; Sherman et al., 2008); yeast analysis performed using the Genecodis webtool (Carmona-Saez et al., 2007; Nogales-Cadenas et al., 2009; Tabas-Madrid et al., 2012).

(E) Serine 51-phosphorylated eIF2 $\alpha$  (p-eIF2 $\alpha$ ) and total eIF2 $\alpha$  levels in *EIF5A*<sup>-/-</sup> and *DOHH*<sup>-/-</sup> HCT116 cells monitored by Western blot. Sodium arsenite (NaAsO<sub>2</sub>)-treatment served as a positive control. Asterisk indicates non-specific band recognized by the anti-p-eIF2 $\alpha$  antibody.



**A**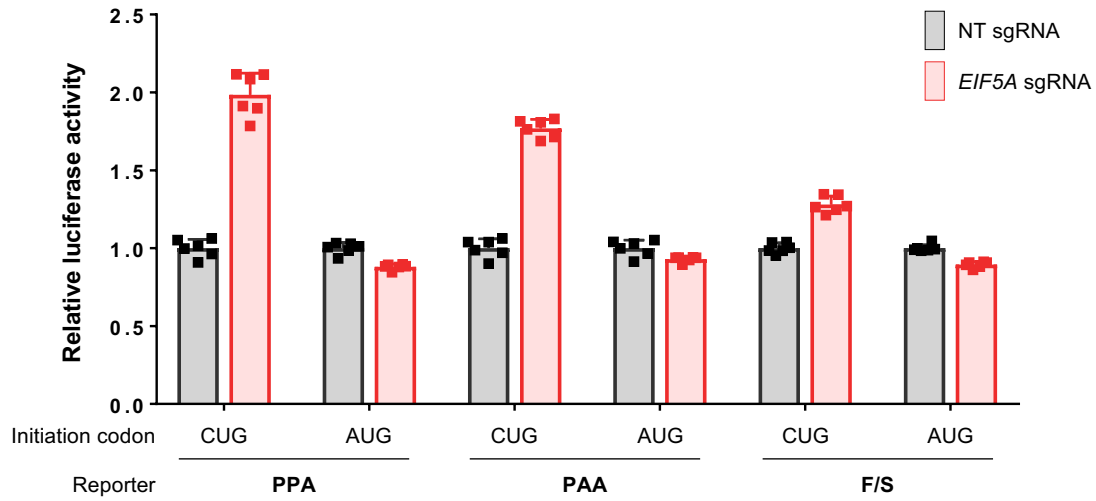**B**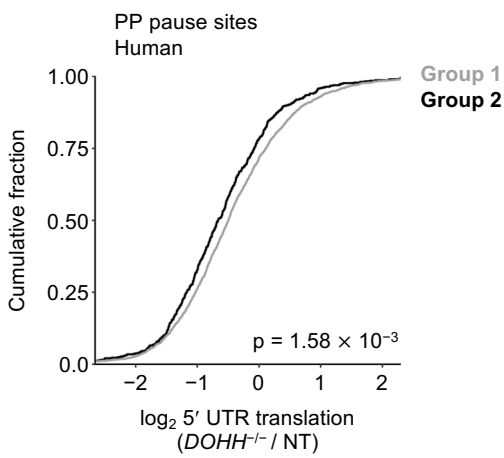**C**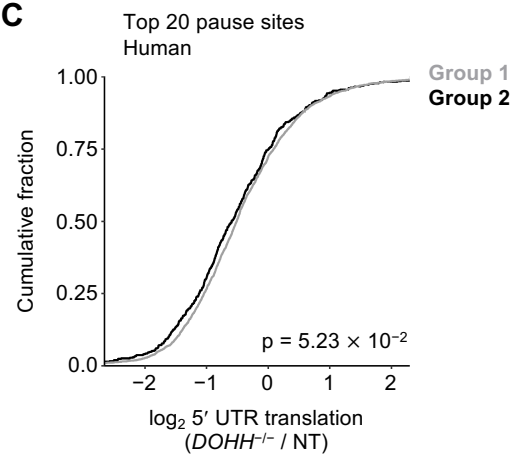**D**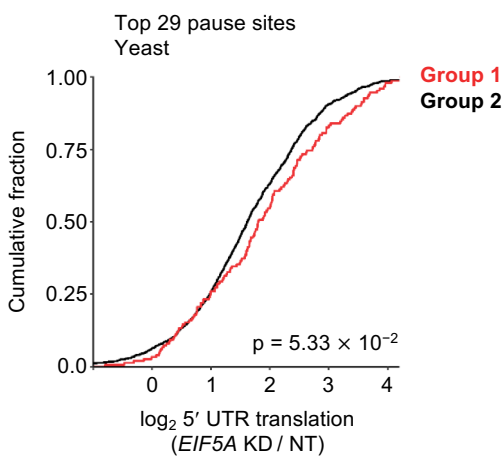

**Figure S5. Proximal ribosome pausing promotes upstream translation on the *MYC* transcript, and broadly throughout the transcriptome, Related to Figures 4 and 5**

(A) Activity of the individual CUG-initiated or AUG-initiated *MYC* reporter constructs used in Figure 4B. Following transfection of reporters into *EIF5A*<sup>-/-</sup> or control sgNT HCT116 cells, firefly luciferase activity was normalized to co-transfected renilla luciferase. Data represented as mean  $\pm$  S.D. (n = 6 biological replicates).

(B-C) CDF plots of 5' UTR translation in *DOHH*<sup>-/-</sup> cells compared to sgNT control, with pause sites defined as PP dipeptides (B), or the top 20 tripeptide pause motifs identified in *EIF5A*<sup>-/-</sup> cells compared to sgNT control (C). 5' UTR translation defined as ribosome occupancy (RPKM) in 5' UTR normalized to transcript expression level derived from RNA-seq (FPKM). Genes included based on minimal coverage requirements: 2589 in Group 1 and 524 in Group 2 for (B); 2570 in Group 1 and 543 in Group 2 for (C).

(D) CDF plot of 5' UTR translation in *EIF5A* KD yeast compared to WT. Pause sites defined as the top 29 tripeptide pause motifs identified in *EIF5A* KD yeast (Schuller et al., 2017). 5' UTR translation defined as normalized ribosome occupancy (RPKM) in 5' UTR / CDS. 150 genes included in Group 1 and 1188 genes included in Group 2 based on minimal coverage criteria.
