# Supplementary material for: Suppression of Ribosomal Pausing by eIF5A Is Necessary to Maintain the Fidelity of Start Codon Selection
Source: PubMed Central journal article supplement — Cell Rep. Author manuscript; Available in PMC 2019 Dec 17. (PMC6917043; doi:10.1016/j.celrep.2019.10.129), 2019-12-03
Supplement: NIHMS1545830-supplement-5.pdf [file NIHMS1545830-supplement-5.pdf]

## Suppression of Ribosomal Pausing by eIF5A Is Necessary to Maintain the Fidelity of Start Codon Selection

### Graphical Abstract

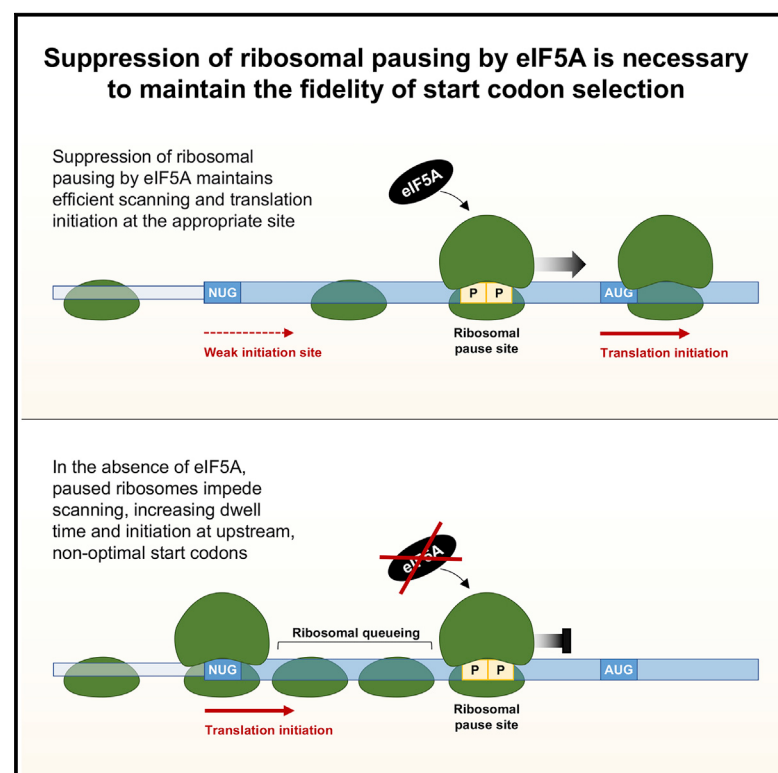

### Authors

Hema Manjunath, He Zhang, Frederick Rehfeld, Jaeil Han, Tsung-Cheng Chang, Joshua T. Mendell

### Correspondence

joshua.mendell@utsouthwestern.edu

### In Brief

Translation initiation codon selection is a highly regulated process that can influence the sequence and activity of a translated protein. Here, Manjunath et al. demonstrate that loss of the translation elongation factor eIF5A triggers widespread translation initiation in 5' UTRs, uncovering a role for this protein in start codon selection.

### Highlights

- A CRISPR screen reveals that eIF5A regulates start codon selection on *MYC* mRNA
- Ribosome profiling demonstrates that eIF5A suppresses ribosomal pausing in human cells
- Loss of eIF5A causes widespread translation initiation in 5' UTRs in human and yeast
- Ribosomal pausing in eIF5A-deficient cells promotes upstream translation initiation

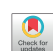

# Suppression of Ribosomal Pausing by eIF5A Is Necessary to Maintain the Fidelity of Start Codon Selection

Hema Manjunath,<sup>1</sup> He Zhang,<sup>2,3</sup> Frederick Rehfeld,<sup>1</sup> Jaeil Han,<sup>1</sup> Tsung-Cheng Chang,<sup>1</sup> and Joshua T. Mendell<sup>1,4,5,6,7,\*</sup>

<sup>1</sup>Department of Molecular Biology, University of Texas Southwestern Medical Center, Dallas, TX 75390-9148, USA

<sup>2</sup>Quantitative Biomedical Research Center, University of Texas Southwestern Medical Center, Dallas, TX 75390-8821, USA

<sup>3</sup>Department of Clinical Sciences, University of Texas Southwestern Medical Center, Dallas, TX 75390-8821, USA

<sup>4</sup>Harold C. Simmons Comprehensive Cancer Center, University of Texas Southwestern Medical Center, Dallas, TX 75390, USA

<sup>5</sup>Hamon Center for Regenerative Science and Medicine, University of Texas Southwestern Medical Center, Dallas, TX 75390, USA

<sup>6</sup>Howard Hughes Medical Institute, University of Texas Southwestern Medical Center, Dallas, TX 75390, USA

<sup>7</sup>Lead Contact

\*Correspondence: [joshua.mendell@utsouthwestern.edu](mailto:joshua.mendell@utsouthwestern.edu)

<https://doi.org/10.1016/j.celrep.2019.10.129>

## SUMMARY

Sequences within 5' UTRs dictate the site and efficiency of translation initiation. In this study, an unbiased screen designed to interrogate the 5' UTR-mediated regulation of the growth-promoting gene *MYC* unexpectedly revealed the ribosomal pause relief factor eIF5A as a regulator of translation initiation codon selection. Depletion of eIF5A enhances upstream translation within 5' UTRs across yeast and human transcriptomes, including on the *MYC* transcript, where this results in increased production of an N-terminally extended protein. Furthermore, ribosome profiling experiments established that the function of eIF5A as a suppressor of ribosomal pausing at sites of suboptimal peptide bond formation is conserved in human cells. We present evidence that proximal ribosomal pausing on a transcript triggers enhanced use of upstream suboptimal or non-canonical initiation codons. Thus, we propose that eIF5A functions not only to maintain efficient translation elongation in eukaryotic cells but also to maintain the fidelity of translation initiation.

## INTRODUCTION

*MYC* encodes a transcription factor that, through the regulation of its target genes, promotes cell growth and malignant transformation. Overexpression or amplification of this gene and the consequent aberrant activation of the *MYC* transcriptional program are oncogenic events that occur frequently in diverse types of cancer (Gabay et al., 2014). Under normal physiologic conditions, *MYC* expression and activity are tightly regulated at all levels of gene expression, from the controlled induction of its transcription (Kelly et al., 1983) to the continuous degradation of *MYC* protein (Farrell and Sears, 2014; Sears, 2004). Accordingly, robust post-transcriptional regulation governs the stability and translation of the *MYC* mRNA, the cues for which are

encoded within the well-conserved untranslated regions (UTRs) of the transcript (Dani et al., 1984; Fraser et al., 1996; Parkin et al., 1988; Yeilding et al., 1996).

In eukaryotes, initiation of translation is a highly regulated process that begins with recruitment of the pre-initiation complex (PIC), comprising the 40S small ribosomal subunit, initiator tRNA, and several eukaryotic initiation factors (eIFs), to the 5' cap. The PIC then scans the transcript in a 5' to 3' direction for a codon in the optimal context for initiation (Jackson et al., 2010; Merrick and Pavitt, 2018). As the PIC traverses the 5' UTR, this region of the transcript can potentially affect the location and rate of translation initiation (Hinnebusch et al., 2016). For instance, many 5' UTRs harbor non-canonical initiation codons that are engaged at lower frequencies or only under specific contexts, whose use can produce a new protein or have effects on translation of the downstream canonical open reading frame (ORF) (Kearse and Wilusz, 2017; Tang et al., 2017; Touriol et al., 2003). The *MYC* 5' UTR, for example, contains a suboptimal CUG initiation codon upstream of the canonical AUG, which, when engaged, leads to the production of an N-terminally extended isoform of the protein (Hann et al., 1988). Such alternatively initiated proteins often have properties and functions that are distinct from their canonically initiated counterparts and add diversity to the repertoire of proteins within a cell (Tang et al., 2004). It has been suggested that the *MYC* N-terminal extension influences the preferred transcriptional targets of the protein (Benassayag et al., 2005; Hann et al., 1994; Sato et al., 2019). A similar configuration exists on other notable mRNAs, such as *PTEN*, in which the use of upstream non-canonical initiation codons produces proteins that adopt different functions, including regulating energy metabolism in mitochondria and influencing PI3K signaling as a secreted protein (Hopkins et al., 2013; Liang et al., 2017, 2014; Tzani et al., 2016).

The mechanisms that regulate alternative start codon selection are not fully understood. The classic model of translation initiation proposes that a scanning PIC will pause at an initiator codon in an appropriate sequence context, triggering a series of events that culminate in large subunit joining and formation of an elongation-competent ribosome (Hinnebusch, 2011). Stabilization of the PIC at a start codon can be influenced by several

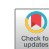

factors, including the initiator tRNA, initiation factors, and/or RNA elements within the 5' UTR. Modulation of any of these determinants of translation initiation can alter start codon choice and either promote, or impede, the use of suboptimal start codons (Asano, 2014; Kears and Wilusz, 2017; Tang et al., 2017). For example, an inhibitor of the translation initiation factor eIF5, known as eIF5-mimic protein 1 (5MP1; encoded by the *BZW2* gene), is overexpressed in colorectal cancer and promotes the use of the *MYC* AUG initiation codon, an event that has been proposed to enhance tumorigenesis in this setting (Sato et al., 2019).

eIF5A (not to be confused with the unrelated protein eIF5 mentioned above) is a highly conserved translation factor whose molecular function has been studied extensively in yeast. Despite being initially classified as an initiation factor, it is now understood to function primarily during translation elongation as a ribosomal pause relief factor, facilitating peptide bond formation at sites at which the peptidyl transfer reaction occurs inefficiently (Dever and Ivanov, 2018; Gregio et al., 2009; Kemper et al., 1976; Pelechano and Alepuz, 2017; Saini et al., 2009; Schuller et al., 2017). eIF5A is the eukaryotic homolog of prokaryotic elongation factor P (EF-P) (Aoki et al., 1997), which also functions to suppress ribosomal pausing. For example, proline-proline (PP) peptide bonds are dependent on eIF5A (or EF-P in bacteria) for their efficient synthesis because this amino acid is a poor substrate for peptide bond formation due to its sterically constrained cyclic ring side chain (Doerfel et al., 2013; Gutierrez et al., 2013; Shin et al., 2017; Ude et al., 2013). A distinctive property of eIF5A is that it is the only known protein to contain the amino acid hypusine, a basic amino acid that is derived from the polyamine biosynthesis pathway and that is post-translationally incorporated into the protein by modification of a lysine residue (Cooper et al., 1983; Dever et al., 2014). Despite detailed characterization of the role of eIF5A in translation in yeast and EF-P in prokaryotes, the role of mammalian eIF5A in translation is not well understood, in part because of the technical difficulties of depleting this essential protein (depmap.org; Meyers et al., 2017; Park et al., 1998; Schnier et al., 1991).

In this study, we initially set out to genetically dissect mechanisms of post-transcriptional regulation of the *MYC* 5' UTR, given the prominent role of this protein in tumorigenesis and its tight regulation under physiologic conditions. Through a fluorescent reporter-coupled genome-scale CRISPR/Cas9-mediated loss-of-function screen, we unexpectedly uncovered a role for eIF5A as a regulator of *MYC* translation initiation codon selection. Loss of eIF5A resulted in enhanced use of the upstream *MYC* CUG start codon. Through ribosome profiling experiments in cells depleted of eIF5A, we demonstrated that this increase in the use of upstream alternative start codons was not unique to *MYC* and occurred broadly throughout the human and yeast transcriptomes. Moreover, we established that the function of eIF5A as a ribosomal pause relief factor is conserved in human cells. Indeed, our findings suggest that ribosomal pausing immediately downstream of alternative initiation sites, an event promoted by depletion of eIF5A, triggers ribosome queuing and, consequently, increased use of upstream start codons on *MYC* and other transcripts. Thus, we propose that eIF5A is a transla-

tion elongation factor that also performs an essential function in maintaining appropriate start codon selection.

## RESULTS

### A Genome-Scale Loss-of-Function Screen Identifies eIF5A as a Regulator of *MYC* Translation Initiation Codon Selection

In order to study post-transcriptional regulation conferred by the *MYC* 5' UTR, we generated reporter constructs in which a constitutive promoter drives expression of an *EGFP*-encoding transcript that either contained or lacked the *MYC* 5' UTR (Figure 1A). These constructs were integrated into a defined locus (*AAVS1/PPP1R12C*) at single copy in the stably diploid human colon cancer cell line HCT116 to generate clonal *MYC* 5' UTR and *EGFP* control reporter cell lines. Consistent with literature indicating that the *MYC* UTRs harbor repressive regulatory cues (Fraser et al., 1996; Parkin et al., 1988), cells expressing the 5' UTR reporter construct were approximately 5 times dimmer than *EGFP* control reporter cells, as indicated by flow cytometry (Figure 1B). We therefore designed a genome-scale CRISPR/Cas9-mediated loss-of-function screen to identify the genes that mediate repression of the 5' UTR reporter (Figure 1A).

CRISPR/Cas9 screening was carried out in both *MYC* 5' UTR and *EGFP* control reporter cell lines as previously described (Golden et al., 2017). Briefly, reporter cells were transduced with a lentiviral library at a low MOI to deliver Cas9 and single guide RNAs (sgRNAs) targeting more than 19,000 human genes, resulting in the generation of a pool of single gene knockouts. Fluorescence-activated cell sorting (FACS) was then used to isolate the brightest cells, thereby enriching for those with impaired repression of the *MYC* 5' UTR. Finally, next-generation sequencing was used to detect sgRNAs that were enriched in the sorted versus the unsorted populations, leading to the identification of genes whose loss of function increased fluorescence in the *MYC* 5' UTR reporter, but not the *EGFP* control reporter, cell line.

Analysis of the screening data revealed that chromatin modifiers (*ASH2L*, *BRD4*) and general transcription factors and co-activators (*TAF1*, *TAF5*, *TAF7*, *CREBBP*) that would be expected to regulate transcription of the reporter constructs were recovered as significant hits in both *MYC* 5' UTR and *EGFP* control reporter screens (Figure S1A). On the basis of a stringent statistical cutoff, four genes were identified as 5' UTR-specific hits: translation factors *EIF5A/EIF5AL1* (enriched sgRNAs targeted both genes that encode nearly identical proteins) and *EIF3L*, the intron lariat debranching enzyme *DBR1*, and miR-889. Validation of screening results, performed by lentiviral delivery of Cas9 and individual sgRNAs, confirmed that *EIF5A/EIF5AL1* and *EIF3L* loss of function increased fluorescence of the *MYC* 5' UTR reporter cells compared with the *EGFP* control cell line (Figure S1B), while loss of *DBR1* and miR-889 did not (data not shown). These data indicated that these translation factors were putative regulators of the *MYC* 5' UTR and prompted us to investigate their effects on endogenous *MYC*.

Despite increasing *EGFP* fluorescence in a *MYC* 5' UTR-specific manner, sgRNAs targeting *EIF3L* did not alter steady-state *MYC* protein levels in HCT116 cells (Figure S1C). It is possible

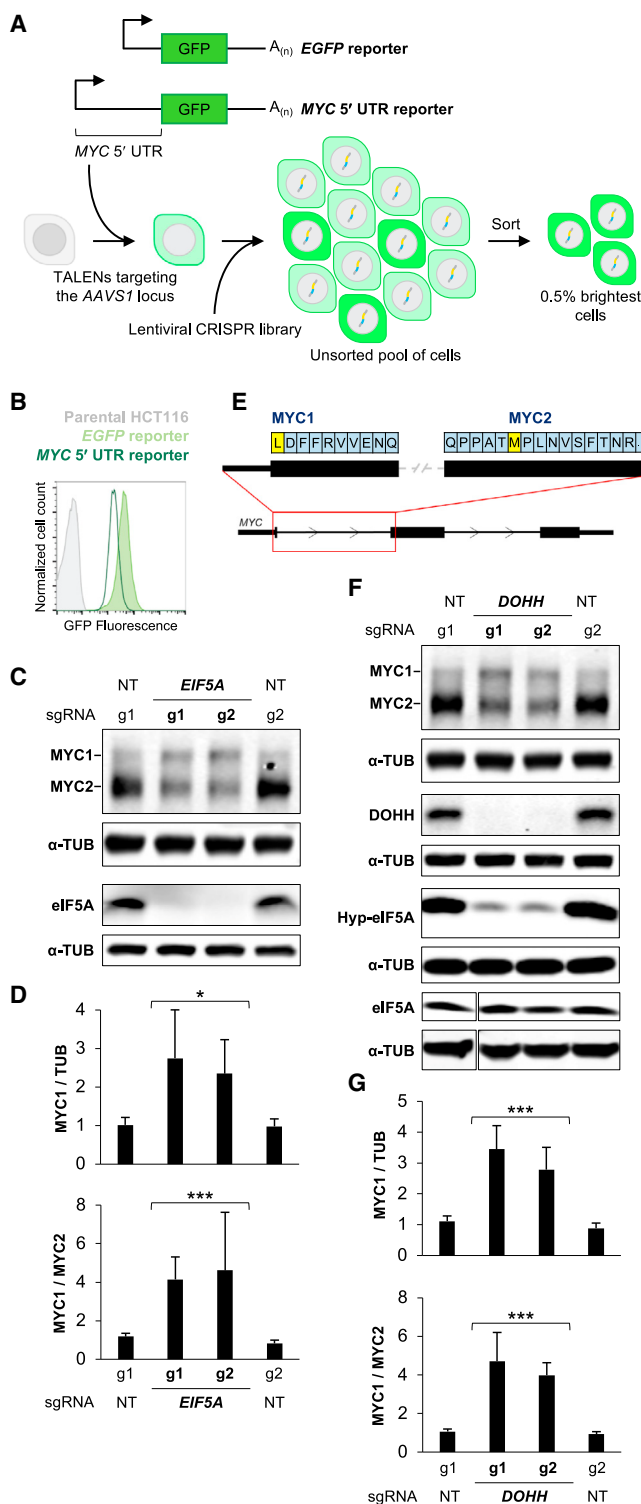

**Figure 1. A Genome-Scale Loss-of-Function Screen Identifies eIF5A as a Regulator of MYC Translation Initiation Codon Selection**  
(A) Schematic of reporter constructs and CRISPR/Cas9 screening strategy.  
(B) Flow cytometry analysis of EGFP fluorescence of reporter cell lines.  
(C) Representative western blot analysis of HCT116 cells following lentiviral delivery of Cas9 and the indicated sgRNAs. In this and all subsequent western

blots, α-TUB is included as a loading control. NT, non-targeting control sgRNA.  
that an effect on endogenous MYC was masked by the multiple redundant mechanisms that regulate MYC abundance, and therefore examination of the *EIF3L*-MYC interaction in other cellular contexts is warranted. Nevertheless, here we chose to focus on the top hit from the screen, *EIF5A/EIF5AL1*. Notably, significantly enriched sgRNAs in the screen targeted both *EIF5A* and its processed pseudogene *EIF5AL1*, which encodes a nearly identical protein. Importantly, *EIF5AL1* was not expressed in HCT116 cells (Figure S1D), and sgRNAs that selectively target *EIF5A* were sufficient to deplete the protein, while those selectively targeting *EIF5AL1* had no effect on protein levels (Figure S1E). Thus, *EIF5A* is the relevant eIF5A-encoding gene in this cell line.

Although eIF5A is an essential protein in eukaryotic cells (depmap.org; Meyers et al., 2017; Park et al., 1998; Schnier et al., 1991), lentiviral delivery of CRISPR components produced cell populations with nearly complete loss of detectable eIF5A protein (Figure 1C). This resulted in a surprising effect on endogenous MYC protein in multiple cell lines, specifically, enhanced production of a larger protein isoform, termed MYC1, initiated from a non-canonical CUG initiation codon in the MYC 5' UTR (Figures 1C–1E and S1F). We confirmed that the more slowly migrating MYC isoform is indeed the N-terminally extended MYC1 protein by introducing a sgRNA that targeted the MYC1 initiation codon (Figures S2A and S2B). As expected, this resulted in a loss of the larger MYC protein isoform in the presence or absence of *EIF5A*-targeting small interfering RNAs (siRNAs) (Figure S2C).

Hypusine, or hydroxyputrescine-lysine, is synthesized by the polyamine biosynthesis pathway and post-translationally incorporated into eIF5A, replacing lysine 50 in the protein (Park and Wolff, 2018). Knockout of deoxyhypusine hydrolase (*DOHH*), which catalyzes the terminal step in this pathway, phenocopied the loss of eIF5A and resulted in enhanced production of MYC1 (Figures 1F, 1G, and S1F). Depletion of *DOHH* significantly reduced hypusine-modified but not total eIF5A levels (Figure 1F), indicating that the hypusine-modified form of eIF5A functions to regulate use of the non-canonical MYC initiation codon. Importantly, MYC mRNA levels and polysome association (Figures S2D–S2F), as well as MYC1 and MYC2 protein stability (Figures S2G–S2H), were not significantly altered upon genetic ablation of *EIF5A* or *DOHH*. Overall, these data reveal that hypusine-modified eIF5A functions as a regulator of non-canonical translation initiation in the MYC 5' UTR.

(D) Quantification of MYC1 protein relative to TUB (upper) or MYC1 relative to MYC2 (lower) from western blots after delivery of the indicated sgRNAs (n = 3 biological replicates, including blots shown in C).  
(E) Schematic of the human MYC transcript.  
(F) Western blot analysis of HCT116 cells following lentiviral delivery of Cas9 and the indicated sgRNAs. Hyp-eIF5A, hypusine-modified eIF5A.  
(G) Quantification of MYC1 protein relative to TUB (upper) or MYC1 relative to MYC2 (lower) from western blots after delivery of the indicated sgRNAs (n = 3 biological replicates, including blots shown in F). Error bars represent SD. \*p < 0.05 and \*\*\*p < 0.001, calculated using two-tailed t test. See also Figures S1 and S2.

Given that the predominant effect of loss of eIF5A on endogenous *MYC* was altered translation initiation codon selection, it was surprising that eIF5A depletion resulted in an increase in fluorescence of the *MYC* 5' UTR *EGFP* reporter. We speculate that the discrepant behavior of the reporter and endogenous *MYC* may arise from a difference in reliance upon eIF5A for efficient translation of the *EGFP* and *MYC* ORFs. As shown below, eIF5A is required for efficient translation of PP and proline-glycine (PG) dipeptides. The *MYC* coding sequence has six such ribosomal pause sites, while *EGFP* has none. Thus, it is expected that efficient translation of *MYC*, but not *EGFP*, would be highly dependent upon eIF5A activity, offering a mechanistic explanation for why an increase in expression of the reporter does not correspond to an increase in endogenous *MYC* protein levels. Nevertheless, for the purposes of this study, rather than further investigating the behavior of the reporter system, we chose to focus our subsequent efforts on dissecting the role of eIF5A in regulating endogenous *MYC* and other transcripts. Ultimately, as shown below, this allowed us to generate new reporters that more accurately recapitulated the behavior of endogenous *MYC*.

### eIF5A Relieves Ribosomal Pausing at PP and PG Dipeptides during Translation Elongation in Human Cells

In order to determine whether eIF5A regulates translation initiation more broadly across the transcriptome, we performed ribosome profiling under eIF5A loss-of-function conditions. Ribosome profiling experiments provide a snapshot of the position of ribosomes on mRNAs across the transcriptome, enabling the visualization of elongating ribosomes, as well as ribosomes that are stalled on transcripts (Brar and Weissman, 2015; Ingolia, 2016). Pools of *EIF5A* and *DOHH* knockout HCT116 cells were generated using two independent sgRNAs per gene. Upon mapping of ribosome footprints to the human transcriptome, a clear periodicity of reads was observed (Figure S3), consistent with the movement of ribosomes along a transcript one codon at a time and indicating the generation of a high-quality ribosome profiling dataset.

In bacteria and yeast, eIF5A homologs have been demonstrated to relieve ribosomal pausing at inefficiently translated peptide sequences, the most prominent of these being PP dipeptides (Pelechano and Alepuz, 2017; Schuller et al., 2017; Woolstenhulme et al., 2015). Thus, we first examined our ribosome profiling dataset to assess whether this function of eIF5A is conserved in human cells. Indeed, we observed that transcripts containing two or more PP dipeptide sequences exhibited increased ribosome occupancy upon loss of eIF5A or *DOHH*, consistent with an increase in stalled ribosomes on these mRNAs (Figures 2A and 2B). In order to directly visualize whether ribosome occupancy is increased at PP sites, we generated meta-codon plots in which transcriptome-wide ribosome occupancy on PP codons and their surrounding sequences within mRNAs were visualized. A clear increase in ribosome occupancy at PP dipeptides in *EIF5A* and *DOHH* knockout cells was observed (Figure 2C), demonstrating that hypusine-modified eIF5A functions to relieve ribosomal pausing at these sequences in human cells.

Recent evidence from yeast demonstrates that several additional peptide motifs, beyond polyproline sequences, may also

require eIF5A for efficient peptide bond formation (Pelechano and Alepuz, 2017; Schuller et al., 2017). A *de novo* motif analysis was therefore performed to identify tripeptide sequences that exhibit increased ribosome occupancy in *EIF5A* or *DOHH* knockout cells (Figures 2D–2F). The tripeptide sequences at which ribosomes are most likely to stall in the absence of eIF5A or *DOHH* show an overrepresentation of PP and PG residues, consistent with previously reported ribosomal stalling sequences in yeast and bacteria (Doerfel et al., 2013; Peil et al., 2013; Pelechano and Alepuz, 2017; Schuller et al., 2017; Woolstenhulme et al., 2015). Additional amino acids were also highly represented, with proline-aspartic acid (PD) dipeptides and several tryptophan-containing motifs among the most enriched (Figure 2F). Visualizing ribosome occupancy at the most highly enriched tripeptide stall motifs identified in the human dataset and their surrounding sequences through a meta-codon plot confirmed that pausing is enhanced at these sites in *EIF5A* or *DOHH* knockout cells (Figure 2G). Collectively, these data demonstrate that the role of eIF5A in relieving ribosomal pausing during translation elongation is conserved from bacteria and yeast to humans.

### Loss of Function of eIF5A Increases Upstream Translation Initiation

Loss of hypusine-modified eIF5A resulted in enhanced upstream translation initiation on the *MYC* mRNA at a non-canonical start codon. To investigate whether this occurs more broadly throughout the transcriptome, we examined upstream translation within the 5' UTRs of transcripts in both yeast and human cells depleted of eIF5A using previously published ribosome profiling data (Schuller et al., 2017) and the data generated in this study. Analysis of data from eIF5A-depleted yeast revealed a dramatic increase in upstream translation of transcripts that fulfilled minimal coverage cutoffs for reliably detectable 5' UTR translation (Figure 3A). These genes included classically studied genes known to harbor upstream ORFs (uORFs) such as *GCN4*, *CPA1*, and *HAP4* (Zhang and Dietrich, 2005; Figures 3B and S4A; Table S1).

We next examined ribosome profiling data from HCT116 cells to assess whether similar effects were detectable in human cells. A global increase in upstream translation in eIF5A- or *DOHH*-depleted cells was not observed (Figures 3C and S4B). Instead, 5' UTR translation was enhanced in a subset of genes that included *MYC* and other transcripts such as *PLOD3* and *CCDC94* (Figures 3D, 3E, and S4C). In total, 295 of 3,447 genes that fulfilled minimal coverage requirements for reliable detection showed at least a 2-fold increase in 5' UTR translation in *EIF5A* knockout cells (Table S2).

An examination of the genes whose upstream translation is increased in eIF5A-depleted cells revealed an overrepresentation of genes associated with the response to cellular stress in both human and yeast ribosome profiling datasets (Figure S4D). Activation of the eukaryotic integrated stress response (ISR) pathway, which coordinates the cellular response to diverse stress stimuli and whose defining feature is phosphorylation of eIF2 $\alpha$  on serine 51, is known to broadly induce upstream translation (Andreev et al., 2015; Starck et al., 2016). We therefore assessed whether loss of hypusine-modified eIF5A activated the

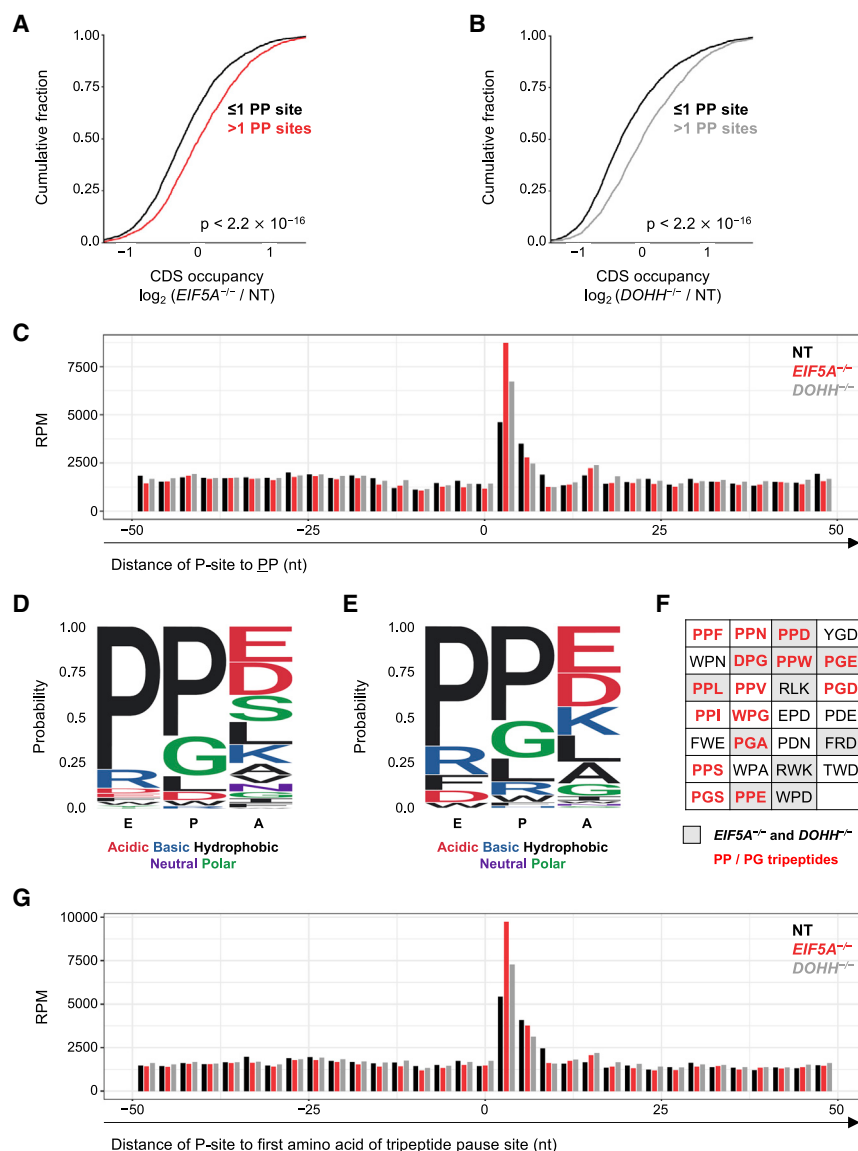

**Figure 2. eIF5A Relieves Ribosomal Pausing at PP and PG Dipeptides during Translation Elongation in Human Cells**

(A and B) Cumulative distribution function (CDF) plots of coding sequence (CDS) ribosome occupancy on transcripts that have either  $\leq 1$  or  $> 1$  PP dipeptide in their ORF in *EIF5A*<sup>-/-</sup> (A) or *DOHH*<sup>-/-</sup> (B) cells relative to cells expressing non-target (NT) sgRNA. CDS occupancy is defined as ribosome occupancy in CDS (RPKM) normalized to transcript expression level derived from RNA-seq (FPKM). Number of genes in the analysis (that fulfilled minimum coverage criteria; see STAR Methods): in (A), 2,467 ( $\leq 1$  PP) and 2,309 ( $> 1$  PP); in (B), 2,597 ( $\leq 1$  PP) and 2,482 ( $> 1$  PP). p values for this and all subsequent CDF plots were calculated using one-sided Kolmogorov-Smirnov tests.

(C) Meta-codon plot of ribosome occupancy in a 100 nt window surrounding all PP dipeptides (28,571 total) in *EIF5A*<sup>-/-</sup>, *DOHH*<sup>-/-</sup>, and control sgNT cells. Mean ribosome occupancy of two biological replicates is shown.

(D and E) Motif analysis of amino acid enrichment within the E, P, and A sites of paused ribosomes in *EIF5A*<sup>-/-</sup> (D) and *DOHH*<sup>-/-</sup> (E) cells, compared with sgNT control cells.

(F) Top tripeptide pause motifs identified in *EIF5A*<sup>-/-</sup> cells (having pause scores  $> 3$  and ranked by ratio of pause score in *EIF5A*<sup>-/-</sup> versus sgNT). PP/PG-containing tripeptides are indicated with red text. Ribosome pause sites identified in both *EIF5A*<sup>-/-</sup> and *DOHH*<sup>-/-</sup> cells are shaded gray.

(G) Meta-codon plot of ribosome occupancy in a 100 nt window surrounding the top 20 tripeptide pause motifs in *EIF5A*<sup>-/-</sup> cells compared with sgNT (32,856 total). Mean ribosome occupancy of two biological replicates is shown.

See also Figure S3.

ISR, which could account for the observed increase in 5' UTR translation. Accumulation of phosphorylated eIF2 $\alpha$ , however, was not observed in *EIF5A*<sup>-/-</sup> or *DOHH*<sup>-/-</sup> cells (Figure S4E), demonstrating that regulation of upstream translation by eIF5A is independent of the ISR pathway. Because transcripts whose translation is activated by the ISR are enriched for upstream initiation codons and uORFs, this class of genes may be particularly reliant upon eIF5A activity to suppress 5' UTR translation under non-stress conditions.

### Loss of eIF5A Promotes Upstream Translation Initiation in the 5' UTR of *PLOD3*

As an initial validation of the ribosome profiling data, we designed reporter constructs to assess non-canonical translation initiation in the 5' UTR of *PLOD3*, a transcript that exhibited upstream translation in *EIF5A*<sup>-/-</sup> and *DOHH*<sup>-/-</sup> cells (Figure 3E; Table S2). Because the *PLOD3* 5' UTR has multiple potential up-

stream initiation codons (AUG or single nucleotide variants thereof) in all three reading frames, we designed three separate reporters in which a P2A-luciferase sequence was fused to the 5' UTR and the proximal segment of the *PLOD3* ORF in all three reading frames (with all potential stop codons removed), with the canonical AUG initiation codon mutated or frameshifted. Luciferase activity was normalized to translation of a reporter that initiated translation at the canonical *PLOD3* AUG start codon. Consistent with the ribosome profiling analysis, increased upstream translation initiation in all three reading frames, but particularly in frame 3, was observed in *EIF5A*<sup>-/-</sup> cells (Figure 3F).

### Ribosomal Pausing Promotes Increased Use of the MYC1 Initiation Codon

Given that the principal effect of eIF5A depletion is increased ribosomal pausing at difficult to translate peptide motifs, we hypothesized that increased 5' UTR translation under these conditions could be a consequence of inefficient translation elongation. Multiple observations supported this concept. First, it was

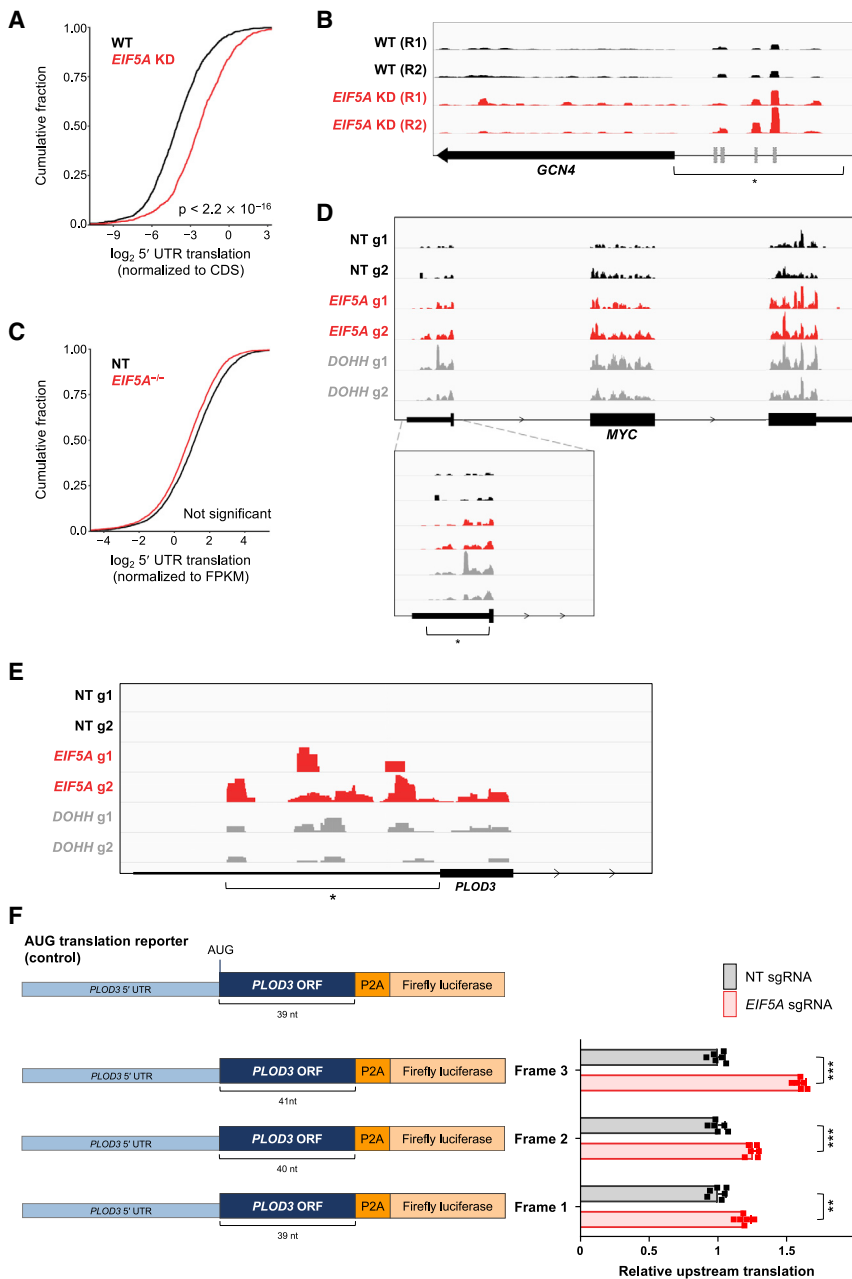

**Figure 3. Loss of Function of eIF5A Increases Upstream Translation Initiation**

(A) CDF plot of 5' UTR translation in *EIF5A* knockdown (KD) and wild-type (WT) yeast. 5' UTR translation defined as normalized ribosome occupancy (RPKM) in 5' UTR/CDS (1,338 genes included on the basis of minimal coverage criteria). Data for this and all subsequent yeast analyses are from Schuller et al. (2017).

(B) Ribosome occupancy on the yeast *GCN4* transcript in *EIF5A* KD and WT yeast. Region of upstream translation is marked with an asterisk. Previously reported uORFs are denoted by gray boxes (Zhang and Dietrich, 2005).

(C) CDF plot of 5' UTR translation in *EIF5A*<sup>-/-</sup> and control sgNT HCT116 cells. 5' UTR translation is defined as ribosome occupancy (RPKM) in 5' UTR normalized to transcript expression level derived from RNA sequencing (RNA-seq) (FPKM; 3,447 genes included on the basis of minimal coverage criteria).

(D and E) Ribosome occupancy on the human *MYC* (D) and *PLOD3* (E) transcripts in *EIF5A*<sup>-/-</sup>, *DOHH*<sup>-/-</sup>, and control sgNT cells. Region of upstream translation is marked with an asterisk.

(F) *PLOD3* reporter constructs used for luciferase assays, consisting of the *PLOD3* 5' UTR and beginning of the *PLOD3* ORF fused to a P2A-luciferase sequence (left). Because the *PLOD3* 5' UTR has multiple potential upstream initiation codons in all three reading frames, the P2A-luciferase sequence was fused in all three reading frames, with all upstream stop codons removed. Following transfection of reporters into *EIF5A*<sup>-/-</sup> or control (sgNT-infected) HCT116 cells, upstream translation was calculated by first normalizing firefly luciferase activity to co-transfected renilla luciferase and then normalizing to activity produced by a construct with the canonical *PLOD3* AUG-initiation codon. Data are represented as mean  $\pm$  SD ( $n = 6$  biological replicates). \*\* $p < 0.001$  and \*\*\* $p < 0.00001$ , calculated using two-tailed Welch's t test.

See also Figure S4, Table S1, and Table S2.

enhance the use of non-canonical start codons (Kearse et al., 2019). Interestingly, we noticed that a strong ribosomal pause motif (PPA) is located between the MYC1 and MYC2 initiation sites on

recently reported that ribosomal pausing in the 5' UTR of the mouse *Azin1* mRNA promoted non-canonical translation initiation within a short distance upstream of the pause site (Ivanov et al., 2018). The authors proposed that this enhanced alternative initiation could be attributed to the queuing of scanning ribosomes upstream of a paused ribosome, resulting in the enhanced positioning of ribosomes at a non-canonical initiation codon. This model is further supported by the demonstration that ribosome stalling induced by a stable RNA secondary structure downstream of a weak translation initiation site enhanced upstream initiation (Kozak, 1990; Liang et al., 2017). Similarly, protein synthesis inhibitors that impair ribosome elongation

the *MYC* transcript (Figure 4A). Thus, we postulated that ribosome stalling in the *MYC* leader sequence may promote enhanced use of the MYC1 translation initiation site upon *eIF5A* loss of function.

To test this model, luciferase constructs that report MYC1 translation were generated (Figure 4B). These constructs consisted of a fragment of the *MYC* transcript beginning upstream of the MYC1 initiation codon and extending into the body of the *MYC* ORF followed by a P2A-luciferase sequence. To specifically measure MYC1-initiated translation, the canonical MYC2 AUG initiation codon was mutated to UUU. Control constructs in which the MYC1 CUG initiation codon was mutated to AUG

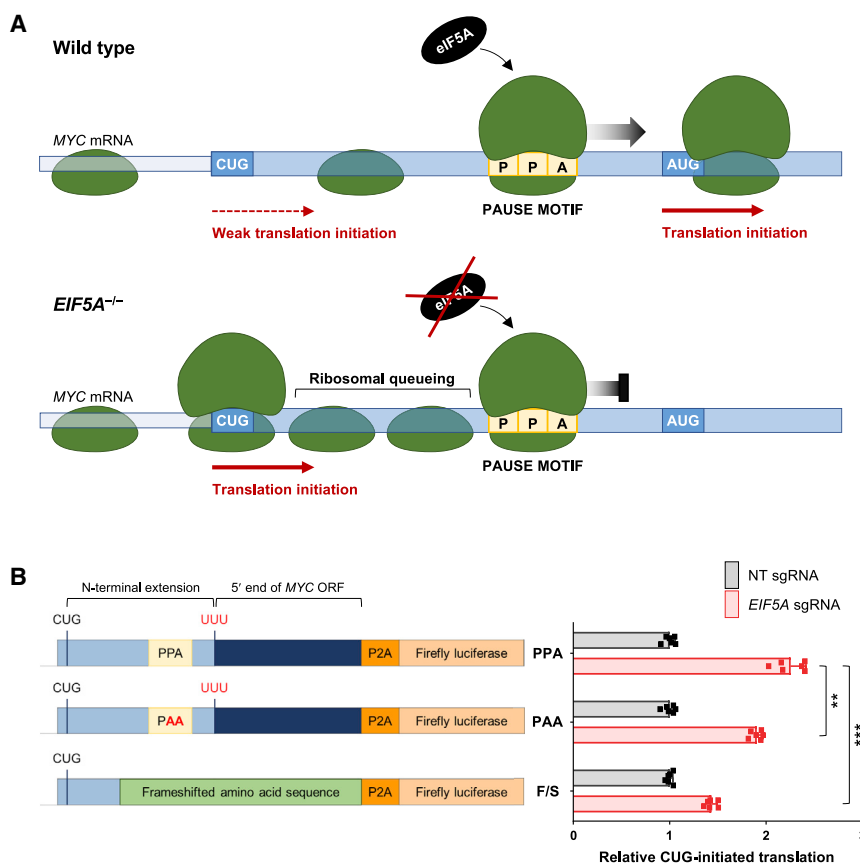

were also generated. Normalization of the luciferase signal produced by CUG-initiated constructs to the signal produced by AUG-initiated derivatives ensured that only the efficiency of non-canonical initiation was measured, and any effects on translation elongation or other downstream events were discounted. Consistent with the behavior of endogenous *MYC*, we observed increased CUG-initiated translation in *EIF5A*<sup>-/-</sup> cells (Figure 4B). This effect was driven by a specific increase in activity of CUG-initiated reporters and was not a normalization artifact due to altered activity of AUG-initiated reporters (Figure S5A). Mutating the PPA tripeptide motif in the *MYC* leader sequence to PAA partially reduced the enhanced CUG-initiated translation observed in *EIF5A*<sup>-/-</sup> conditions. Moreover, a frameshift mutation that eliminated the PPA motif and altered the surrounding amino acids strongly impaired CUG-initiated translation. These data support the model that ribosomal pausing in the proximal segment of the *MYC* transcript in *EIF5A*-deficient cells promotes upstream translation initiation at the non-canonical MYC1 initiation codon. The behavior of the frameshifted reporter suggests that pausing in this region of the transcript is mediated not only by the PPA tripeptide motif but also by other N-terminal amino acids encoded in this sequence. This is in accordance with previous reports showing that amino acids upstream and downstream of pause sites, as well as amino acids within the nascent peptide chain in the exit channel of the ribosome, can influence the extent of ribosomal pausing (Buskirk and Green, 2017; Peil et al., 2013).

#### Figure 4. Ribosomal Pausing Promotes Increased Use of the MYC1 Initiation Codon

(A) Model of ribosome pause-induced upstream initiation on the *MYC* transcript. Enhanced pausing at the PPA tripeptide motif within the *MYC* leader in *EIF5A*<sup>-/-</sup> cells may lead to queuing of scanning ribosomes upstream, thereby promoting increased use of the MYC1 initiation codon.

(B) *MYC* reporter constructs used for luciferase assays, consisting of a 5' segment of the *MYC* transcript fused to a P2A-luciferase sequence (left). The frameshift (F/S) reporter was constructed by deleting a single nucleotide six codons upstream of the PPA pause motif, thus altering all encoded amino acids downstream until the P2A sequence. Following transfection of reporters into *EIF5A*<sup>-/-</sup> or control (sgNT-infected) HCT116 cells, CUG-initiated translation was calculated by first normalizing firefly luciferase activity to co-transfected renilla luciferase and then normalizing to activity produced by an otherwise identical AUG-initiated construct. Data are represented as mean ± SD (n = 6 biological replicates). \*\*p < 0.001 and \*\*\*p < 0.00001, calculated using two-tailed Welch's t test.

See also Figure S5.

#### Proximal Ribosomal Pausing Triggers Widespread Upstream Translation Initiation

We next examined ribosome profiling data to determine whether proximal ribosomal pausing influences start codon selection more broadly throughout the transcriptome. Transcripts were segregated into two groups on the basis of their predicted behavior according to our pausing-associated upstream initiation model (Figure 5A).

Group 1 comprised genes that were predicted to show increased 5' UTR translation in *EIF5A*<sup>-/-</sup> cells, specifically genes whose transcripts contained a canonical (AUG) or non-canonical (any single nucleotide variant of AUG) initiation site upstream of the annotated start site and a downstream in-frame ribosomal pause site within 67 codons. This window was chosen because of evidence indicating that this was the maximal distance that allowed effective ribosome queuing-mediated effects on alternative translation initiation (Ivanov et al., 2018). All other genes that did not satisfy these criteria were placed into group 2. 5' UTR translation in these transcripts under conditions of *EIF5A* or DOHH loss of function was then assessed.

We first defined group 1 transcripts as those containing a PP dipeptide, the minimal, classically studied *EIF5A*-associated pause motif, downstream of putative 5' UTR initiation sites. Notably, of the 295 genes that showed at least a 2-fold increase in upstream translation in *EIF5A* knockout cells described above, 259 fulfilled these criteria and were classified as group 1. Consistent with the behavior of these 259 genes, group 1 transcripts exhibited an overall increase in 5' UTR translation upon *EIF5A* and DOHH loss of function (Figures 5B and S5B). We also detected an increase in upstream translation in *EIF5A*<sup>-/-</sup> cells when we reclassified group 1 to

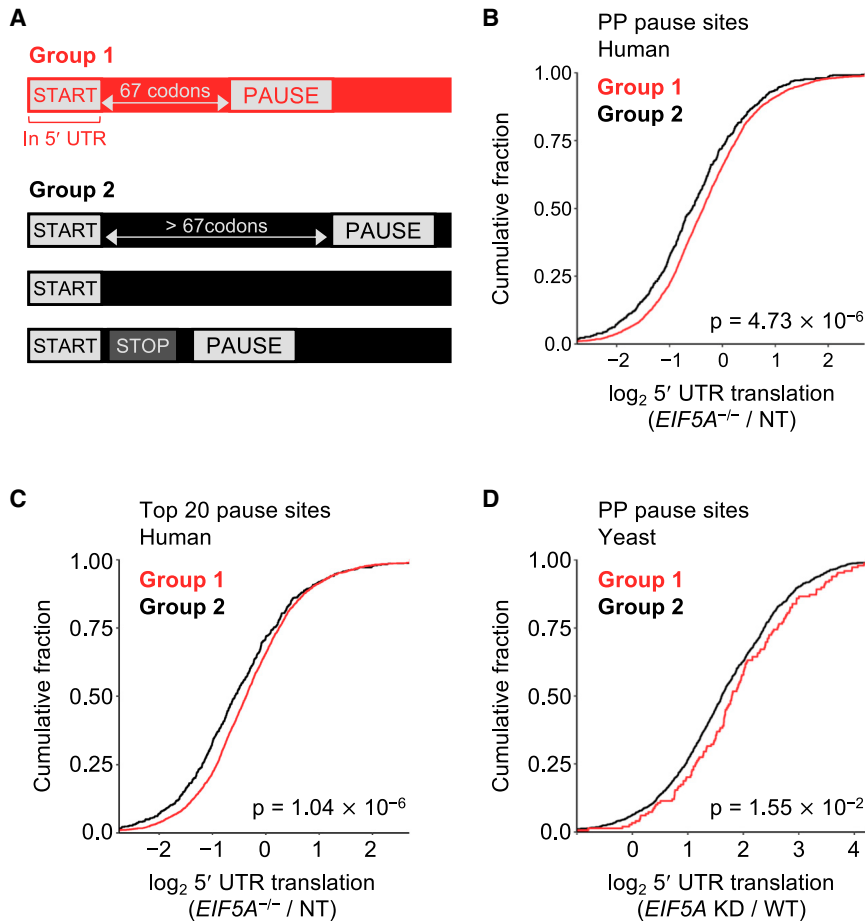

**Figure 5. Proximal Ribosomal Pausing Triggers Widespread Upstream Translation Initiation**

(A) Genes were classified into those that contained an upstream AUG or single-nucleotide variant thereof within 67 codons of an in-frame pause site (group 1) and all others (group 2).

(B and C) CDF plots of 5' UTR translation in *EIF5A*<sup>-/-</sup> cells compared with sgNT control, with pause sites defined as PP dipeptides (B) or the top 20 tripeptide pause motifs identified in *EIF5A*<sup>-/-</sup> cells compared to sgNT control (C). 5' UTR translation was defined as ribosome occupancy (RPKM) in 5' UTR normalized to transcript expression level derived from RNA-seq (FPKM). Genes included on the basis of minimal coverage requirements: 2,877 in group 1 and 570 in group 2 for (B) and 2,860 in group 1 and 587 in group 2 for (C).

(D) CDF plot of 5' UTR translation in *EIF5A* KD yeast compared with WT. Pause sites defined as PP dipeptides. 5' UTR translation was defined as normalized ribosome occupancy (RPKM) in 5' UTR/CDS. One hundred forty-nine genes were included in group 1 and 1,189 genes were included in group 2 on the basis of minimal coverage criteria.

See also Figure S5.

comprise genes that contain an upstream initiation site followed by an in-frame pause site defined as any of the top 20 pause motifs identified in our *de novo* analysis (Figures 2F and 5C). A similar trend was also documented in *DOHH*<sup>-/-</sup> cells, although the effect did not reach statistical significance under these conditions (Figure S5C). Last, when this model was applied to yeast ribosome profiling data, similar effects were observed (Figures 5D and S5D). Collectively, these data support the model that hypusine-modified eIF5A is required to suppress widespread proximal ribosomal pausing in order to maintain efficient scanning and accurate start codon selection, in a manner that is conserved in yeast and human cells.

## DISCUSSION

Accumulating evidence from multiple tumor types has established that altered translational control plays an important role in cancer pathogenesis (Truitt and Ruggero, 2016). This principle is exemplified by the growth-promoting mTOR pathway, which is activated in many malignancies and promotes translation of specific mRNAs through multiple mechanisms (Hsieh et al., 2012; Mossmann et al., 2018; Nandagopal and Roux, 2015; Roux and Topisirovic, 2018). For example, translation of *MYC* and other mRNAs whose 5' UTRs contain complex secondary structures is stimulated by the mTOR pathway in response to growth

factors, nutrients, and oncogenic signaling. Activity of the mTORC1 complex, through phosphorylation of its protein targets S6K and eIF4E-BPs, promotes the assembly of the cap-binding complex (comprising eIF4E, eIF4G, and

eIF4A) and thus facilitates translation of difficult to translate messages, including *MYC*.

Given the importance of regulation of *MYC* expression at multiple post-transcriptional levels, including translational control, we performed an unbiased screen to identify new regulators of the *MYC* 5' UTR. These experiments led to the discovery of an unexpected role for eIF5A as a regulator of start codon selection. In the case of the *MYC* transcript, eIF5A depletion triggered the enhanced production of the N-terminally extended MYC1 protein initiated at an upstream CUG start codon. Similar effects, specifically enhanced translation initiation at suboptimal or non-canonical initiation codons in 5' UTRs, occurred broadly throughout the human and yeast transcriptomes under conditions of eIF5A loss of function. Ribosome profiling experiments demonstrated that the function of eIF5A as a suppressor of ribosomal pausing at difficult to translate peptide motifs is conserved in human cells and provided strong evidence that ribosomal pausing promotes the use of upstream initiation codons in eIF5A-deficient cells. These findings extend our understanding of the functions of this deeply conserved translation factor and uncover a role for eIF5A in maintaining the fidelity of translation initiation.

Reporter-coupled CRISPR/Cas9 screening represents a powerful approach for dissecting mechanisms of post-transcriptional gene regulation. This work was initiated with a

genome-wide screen to interrogate regulators of the *MYC* 5' UTR. Two important translation factors emerged from the screen: eIF3L and eIF5A. Our finding that eIF3L is a putative repressor of the *MYC* 5' UTR is in line with reports suggesting that in addition to a general role for the large multi-subunit eIF3 complex in translation initiation, specialized eIF3 complexes may direct the translational repression of a subset of transcripts, such as *BTG1* (Lee et al., 2015). Although *EIF3L* knockout did not increase steady-state *MYC* protein levels in HCT116 cells, possibly because of multiple redundant levels of *MYC* regulation in this cell line, further examination of this putative regulatory interaction in other contexts remains an interesting direction for future work.

Loss of eIF5A, the top hit from our screen, resulted in enhanced EGFP fluorescence produced by the *MYC* 5' UTR reporter but, unexpectedly, altered endogenous *MYC* translation initiation codon selection rather than increasing total *MYC* protein levels. As discussed above, these apparently discordant results may have arisen in part from differences in the requirement for eIF5A to facilitate translation elongation through the *EGFP* and *MYC* ORFs. The *MYC* coding sequence has six strong PP or PG ribosomal pause sites, while *EGFP* has none, suggesting that efficient translation through the *MYC* ORF may be highly dependent on eIF5A. Rather than further investigating the behavior of the reporter, however, we chose to focus on dissecting the role of this protein in regulating endogenous *MYC* and other transcripts. Ultimately, our transcriptome-wide analyses of eIF5A function not only allowed us to elucidate a role for eIF5A in translation initiation but also enabled the generation of new reporters that, unlike the *EGFP* reporter, accurately recapitulated the behavior of endogenous *MYC* (Figure 4).

The established function of eIF5A, derived from an extensive body of work studying the yeast and bacterial orthologs, is to relieve ribosomal pausing at sites of inefficient peptide bond formation (Pelechano and Alepuz, 2017; Schuller et al., 2017; Woolstenhulme et al., 2015). Here we globally analyzed translation in human cells lacking this protein, demonstrating that this molecular function is conserved and supporting a role for eIF5A as a universal pause relief factor. We observed that hypusine-modified eIF5A alleviates ribosomal pausing primarily at PP and PG dipeptides in human cells. This generally agrees with previously identified pause signatures and is consistent with literature implicating these amino acids as suboptimal substrates for peptide bond formation (Doerfel et al., 2013; Pavlov et al., 2009; Peil et al., 2013; Pelechano and Alepuz, 2017; Schuller et al., 2017; Shin et al., 2017). This functional conservation of eIF5A is a direct reflection of the remarkable degree to which the homologs of these proteins are conserved in sequence and structure across kingdoms (Dever et al., 2014; Magdolen et al., 1994). Notably, our data are also consistent with prior literature indicating that the hypusine modification is critical for eIF5A function (Cano et al., 2008; Schnier et al., 1991).

Suppression of ribosomal pausing by eIF5A is necessary to maintain efficient translation elongation. Interestingly, it has been suggested that depletion of EF-P, the bacterial eIF5A ortholog, not only impairs elongation but also inhibits translation initiation on certain transcripts, specifically those harboring start codons located upstream of strong ribosomal pause sites (Wool-

stenhulme et al., 2015). Ribosome queuing upstream of these pause sites was proposed to sterically block access of initiating ribosomes to start codons on these mRNAs. Our analysis of human and yeast eIF5A also supports a role for this protein in regulating translation initiation in an analogous manner. Unlike the data from bacterial systems, however, our findings suggest that ribosome queuing upstream of pause sites in eIF5A-depleted eukaryotic cells increases the use of suboptimal or non-canonical start codons in 5' UTRs. This model is supported by the demonstration that sites of inefficient peptide bond formation, thermostable RNA structures, or pharmacologic agents that impede ribosomal elongation can similarly enhance translation initiation from AUG codons in suboptimal Kozak contexts or non-AUG codons in both viral (Ventoso et al., 2006) and endogenous transcripts (Ivanov et al., 2018; Kearsse et al., 2019; Kozak, 1990; Liang et al., 2017). Taken together, the existing data from eukaryotic systems suggest that in the absence of eIF5A, stalled ribosomes in 5' UTRs or proximal coding sequences lead to ribosome queuing, which impedes the efficient scanning of PICs before they reach downstream, optimal start codons (as illustrated by the *MYC* transcript in Figure 4A). The subsequent increase in dwell time of these complexes in the 5' UTR may increase the probability of translation initiation at upstream, non-optimal initiation codons.

Whether there is a physiologic role for enhanced upstream translation initiation triggered by proximal ribosomal pausing is an interesting question for future study. Analysis of yeast ribosome profiling data revealed a widespread increase in 5' UTR translation across the transcriptome upon depletion of eIF5A, an effect that occurred on a more restricted set of human transcripts. Nevertheless, in both yeast and human cells, transcripts encoding mediators of the cellular stress response, which have been documented to harbor suboptimal or non-canonical translation initiation sites within their 5' UTRs, exhibited a dependence on eIF5A for maintenance of appropriate translation initiation. Taken together with the fact that widespread and early (within 50–65 codons of initiation) ribosomal pausing has been documented under specific stress conditions (Liu et al., 2013; Shalgi et al., 2013), our data suggest that the mechanism of proximal pause-induced upstream initiation may be pervasively used to enhance translation of mRNAs encoding stress response factors.

Multiple lines of evidence also suggest the intriguing possibility that enhanced upstream translation initiation, caused by activation of the ISR or impaired eIF5A activity, may contribute to cancer pathogenesis. In a mouse model of squamous cell carcinoma, for example, elevated eIF2 $\alpha$  phosphorylation, indicative of activation of the ISR, was associated with the use of an eIF2A-driven translational program that facilitated preferential translation of oncogenic mRNAs initiated from upstream start codons (Sendoel et al., 2017). eIF5A loss of function may trigger a similar effect in several human cancers. *EIF5A* is located within the frequently deleted human 17p locus that also contains the tumor suppressor *TP53*. Approximately 50% of all human cancers exhibit inactivation of *TP53*, and a majority of these malignancies contain at least one large 17p deletion, thus concurrently ablating *EIF5A*. The functional relevance of *TP53-EIF5A* co-deletion was substantiated by the demonstration that loss of function

of *EIF5A*, or other members of the polyamine-hypusine pathway, accelerated MYC-driven lymphomagenesis in mice (Liu et al., 2016; Scuoppo et al., 2012). Whether these effects are driven by enhanced production and oncogenic activity of MYC1 in this model, or the more widespread induction of ribosomal pausing and upstream translation, remains to be established. Additionally, it is important to note that overexpression of *EIF5A* has been observed in some tumor types (Tunca et al., 2013), raising the possibility that more efficient suppression of ribosomal pausing, and potentially reduced production of MYC1, may be favored in some cancer contexts.

We have demonstrated that ribosomal pausing and increased upstream translation on *MYC* and other transcripts can be induced by depletion of total or hypusine-modified eIF5A. Thus, it also is likely that upstream signals that modulate cellular polyamine levels, and consequently levels of hypusine-modified eIF5A, can similarly influence alternative initiation. Polyamines—putrescine, spermidine, and spermine—are essential cations that, in addition to serving as obligate precursors for the production of hypusine, have myriad cellular functions that support the demands of cellular growth, including chromatin maintenance, scavenging of free radicals, and binding to ribosomal components to promote translation (Casero and Marton, 2007; Dever and Ivanov, 2018). Accordingly, oncogenic signaling can induce polyamine production, and MYC itself promotes transcription of several enzymes in the polyamine-biosynthesis pathway (Bachmann and Geerts, 2018). Although modulation of cellular polyamine levels would be expected to have pleiotropic effects on cell growth and homeostasis, our findings reveal that start codon selection may be broadly affected under these conditions as well. Thus, the effect of polyamine availability on translational reprogramming through modulation of eIF5A activity is an interesting area for further investigation.

In conclusion, we have demonstrated that suppression of ribosomal pausing by eIF5A is a highly conserved function that is required not only to maintain efficient translation within ORFs but also to suppress the use of upstream initiation codons. These findings highlight the broad influence of ribosomal pausing on multiple steps of translation. Further study of the stimuli that cause an elongating ribosome to stall, including eIF5A-associated pause cues, as well as other triggers of pausing such as tRNA abundance and RNA secondary structure, will enable the dissection of subsequent effects on the transcriptome and proteome and the physiological contexts in which these mechanisms are used for gene regulation.

## STAR★METHODS

Detailed methods are provided in the online version of this paper and include the following:

- KEY RESOURCES TABLE
- LEAD CONTACT AND MATERIALS AVAILABILITY
- EXPERIMENTAL MODEL AND SUBJECT DETAILS
- METHOD DETAILS
  - Construction of MYC-EGFP reporter constructs
  - Generation of clonal fluorescent reporter cell lines

- Genome-wide CRISPR/Cas9 screening
- Knockout of genes via lentiviral delivery of CRISPR/Cas9 components
- Genome editing of the MYC1 initiation codon
- Western blot analysis
- RNA isolation and qRT-PCR
- Ribosome profiling
- Arsenite treatment
- Luciferase reporter assays
- QUANTIFICATION AND STATISTICAL ANALYSIS
  - Analysis of genome-scale CRISPR/Cas9 screening data
  - Bioinformatic analysis of ribosome profiling data
- DATA AND CODE AVAILABILITY

## SUPPLEMENTAL INFORMATION

Supplemental Information can be found online at <https://doi.org/10.1016/j.celrep.2019.10.129>.

## ACKNOWLEDGMENTS

We thank Rudolph Jaenisch, Didier Trono, and Feng Zhang and for plasmids; Vanessa Schmid, Rachel Bruce, and Caitlin Eaton at the McDermott Center Next Generation Sequencing Core for assistance with high-throughput sequencing; Angie Mobley and the University of Texas (UT) Southwestern (UTSW) Flow Cytometry Core facility for FACS; Frank Gillett for experimental assistance; and Stephen Johnson for software implementation. We also thank Michael Buszczak, Kathryn O'Donnell, and members of the Mendell laboratory for helpful comments on the manuscript. This work was supported by grants from CPRIT (RP160249 to J.T.M. and RP150596 for the UTSW Bioinformatics Core Facility), the NIH (R35CA197311, P30CA142543, and P50CA196516 to J.T.M.), and the Welch Foundation (I-1961-20180324 to J.T.M.). J.T.M. is an investigator of the Howard Hughes Medical Institute.

## AUTHOR CONTRIBUTIONS

All authors contributed to experimental design and data interpretation. H.M., F.R., J.H., and T.-C.C. performed the molecular biology experiments. H.Z. performed bioinformatics analyses. H.M. and J.T.M. wrote the manuscript.

## DECLARATION OF INTERESTS

The authors declare no competing interests.

Received: July 30, 2019  
 Revised: October 19, 2019  
 Accepted: October 30, 2019  
 Published: December 3, 2019

## SUPPORTING CITATIONS

The following references appear in the Supplemental Information: Carmona-Saez et al. (2007); Huang et al. (2009); Nogales-Cadenas et al. (2009); Tabas-Madrid et al. (2012).

## REFERENCES

Andreev, D.E., O'Connor, P.B.F., Fahey, C., Kenny, E.M., Terenin, I.M., Dmitriev, S.E., Cormican, P., Morris, D.W., Shatsky, I.N., and Baranov, P.V. (2015). Translation of 5' leaders is pervasive in genes resistant to eIF2 repression. *eLife* 4, e03971.

- Aoki, H., Dekany, K., Adams, S.L., and Ganoza, M.C. (1997). The gene encoding the elongation factor P protein is essential for viability and is required for protein synthesis. *J. Biol. Chem.* 272, 32254–32259.
- Asano, K. (2014). Why is start codon selection so precise in eukaryotes? *Translation (Austin)* 2, e28387.
- Bachmann, A.S., and Geerts, D. (2018). Polyamine synthesis as a target of MYC oncogenes. *J. Biol. Chem.* 293, 18757–18769.
- Benassayag, C., Montero, L., Colombi, N., Gallant, P., Cribbs, D., and Morrello, D. (2005). Human c-Myc isoforms differentially regulate cell growth and apoptosis in *Drosophila melanogaster*. *Mol. Cell. Biol.* 25, 9897–9909.
- Brar, G.A., and Weissman, J.S. (2015). Ribosome profiling reveals the what, when, where and how of protein synthesis. *Nat. Rev. Mol. Cell Biol.* 16, 651–664.
- Buskirk, A.R., and Green, R. (2017). Ribosome pausing, arrest and rescue in bacteria and eukaryotes. *Philos. Trans. R. Soc. Lond. B Biol. Sci.* 372, 20160183.
- Cano, V.S.P., Jeon, G.A., Johansson, H.E., Henderson, C.A., Park, J.H., Valentini, S.R., Hershey, J.W.B., and Park, M.H. (2008). Mutational analyses of human eIF5A-1—identification of amino acid residues critical for eIF5A activity and hypusine modification. *FEBS J.* 275, 44–58.
- Carmona-Saez, P., Chagoyen, M., Tirado, F., Carazo, J.M., and Pascual-Montano, A. (2007). GENECODIS: a web-based tool for finding significant concurrent annotations in gene lists. *Genome Biol.* 8, R3.
- Casero, R.A., Jr., and Marton, L.J. (2007). Targeting polyamine metabolism and function in cancer and other hyperproliferative diseases. *Nat. Rev. Drug Discov.* 6, 373–390.
- Chan, P.P., and Lowe, T.M. (2016). GtRNAdb 2.0: an expanded database of transfer RNA genes identified in complete and draft genomes. *Nucleic Acids Res.* 44 (D1), D184–D189.
- Cooper, H.L., Park, M.H., Folk, J.E., Safer, B., and Braverman, R. (1983). Identification of the hypusine-containing protein hy+ as translation initiation factor eIF-4D. *Proc. Natl. Acad. Sci. U S A* 80, 1854–1857.
- Dani, C., Blanchard, J.M., Piechaczyk, M., El Sabouty, S., Marty, L., and Jean-teur, P. (1984). Extreme instability of myc mRNA in normal and transformed human cells. *Proc. Natl. Acad. Sci. U S A* 81, 7046–7050.
- Dever, T.E., and Ivanov, I.P. (2018). Roles of polyamines in translation. *J. Biol. Chem.* 293, 18719–18729.
- Dever, T.E., Gutierrez, E., and Shin, B.S. (2014). The hypusine-containing translation factor eIF5A. *Crit. Rev. Biochem. Mol. Biol.* 49, 413–425.
- Doerfel, L.K., Wohlgemuth, I., Kothe, C., Peske, F., Urlaub, H., and Rodnina, M.V. (2013). EF-P is essential for rapid synthesis of proteins containing consecutive proline residues. *Science* 339, 85–88.
- Engel, S.R., Dietrich, F.S., Fisk, D.G., Binkley, G., Balakrishnan, R., Costanzo, M.C., Dwight, S.S., Hitz, B.C., Karra, K., Nash, R.S., et al. (2014). The reference genome sequence of *Saccharomyces cerevisiae*: then and now. *G3 (Bethesda)* 4, 389–398.
- Farrell, A.S., and Sears, R.C. (2014). MYC degradation. *Cold Spring Harb. Perspect. Med.* 4, a014365.
- Frankish, A., Diekhans, M., Ferreira, A.M., Johnson, R., Jungreis, I., Loveland, J., Mudge, J.M., Sisu, C., Wright, J., Armstrong, J., et al. (2019). GENCODE reference annotation for the human and mouse genomes. *Nucleic Acids Res.* 47 (D1), D766–D773.
- Fraser, S.D., Wilkes-Johnston, J., and Browder, L.W. (1996). Effects of c-myc first exons and 5' synthetic hairpins on RNA translation in oocytes and early embryos of *Xenopus laevis*. *Oncogene* 12, 1223–1230.
- Gabay, M., Li, Y., and Felsher, D.W. (2014). MYC activation is a hallmark of cancer initiation and maintenance. *Cold Spring Harb. Perspect. Med.* 4, a014241.
- Golden, R.J., Chen, B., Li, T., Braun, J., Manjunath, H., Chen, X., Wu, J., Schmid, V., Chang, T.C., Kopp, F., et al. (2017). An Argonaute phosphorylation cycle promotes microRNA-mediated silencing. *Nature* 542, 197–202.
- Greggio, A.P.B., Cano, V.P.S., Avaca, J.S., Valentini, S.R., and Zanelli, C.F. (2009). eIF5A has a function in the elongation step of translation in yeast. *Biochem. Biophys. Res. Commun.* 380, 785–790.
- Gutierrez, E., Shin, B.S., Woolstenhulme, C.J., Kim, J.R., Saini, P., Buskirk, A.R., and Dever, T.E. (2013). eIF5A promotes translation of polyproline motifs. *Mol. Cell* 51, 35–45.
- Hann, S.R., King, M.W., Bentley, D.L., Anderson, C.W., and Eisenman, R.N. (1988). A non-AUG translational initiation in c-myc exon 1 generates an N-terminally distinct protein whose synthesis is disrupted in Burkitt's lymphomas. *Cell* 52, 185–195.
- Hann, S.R., Dixit, M., Sears, R.C., and Sealy, L. (1994). The alternatively initiated c-Myc proteins differentially regulate transcription through a noncanonical DNA-binding site. *Genes Dev.* 8, 2441–2452.
- Hinnebusch, A.G. (2011). Molecular mechanism of scanning and start codon selection in eukaryotes. *Microbiol. Mol. Biol. Rev.* 75, 434–467.
- Hinnebusch, A.G., Ivanov, I.P., and Sonenberg, N. (2016). Translational control by 5'-untranslated regions of eukaryotic mRNAs. *Science* 352, 1413–1416.
- Hockemeyer, D., Soldner, F., Beard, C., Gao, Q., Mitalipova, M., DeKelver, R.C., Katibah, G.E., Amora, R., Boydston, E.A., Zeitler, B., et al. (2009). Efficient targeting of expressed and silent genes in human ESCs and iPSCs using zinc-finger nucleases. *Nat. Biotechnol.* 27, 851–857.
- Hopkins, B.D., Fine, B., Steinbach, N., Dendy, M., Rapp, Z., Shaw, J., Pappas, K., Yu, J.S., Hodakowski, C., Mense, S., et al. (2013). A secreted PTEN phosphatase that enters cells to alter signaling and survival. *Science* 341, 399–402.
- Hsieh, A.C., Liu, Y., Edlind, M.P., Ingolia, N.T., Janes, M.R., Sher, A., Shi, E.Y., Stumpf, C.R., Christensen, C., Bonham, M.J., et al. (2012). The translational landscape of mTOR signalling steers cancer initiation and metastasis. *Nature* 485, 55–61.
- Huang, W., Sherman, B.T., and Lempicki, R.A. (2009). Systematic and integrative analysis of large gene lists using DAVID bioinformatics resources. *Nat. Protoc.* 4, 44–57.
- Ingolia, N.T. (2016). Ribosome footprint profiling of translation throughout the genome. *Cell* 165, 22–33.
- Ingolia, N.T., Brar, G.A., Rouskin, S., McGeachy, A.M., and Weissman, J.S. (2012). The ribosome profiling strategy for monitoring translation in vivo by deep sequencing of ribosome-protected mRNA fragments. *Nat. Protoc.* 7, 1534–1550.
- Ivanov, I.P., Shin, B.S., Loughran, G., Tzani, I., Young-Baird, S.K., Cao, C., Atkins, J.F., and Dever, T.E. (2018). Polyamine control of translation elongation regulates start site selection on antizyme inhibitor mRNA via ribosome queuing. *Mol. Cell* 70, 254–264.e6.
- Jackson, R.J., Hellen, C.U., and Pestova, T.V. (2010). The mechanism of eukaryotic translation initiation and principles of its regulation. *Nat. Rev. Mol. Cell Biol.* 11, 113–127.
- Kearse, M.G., and Wilusz, J.E. (2017). Non-AUG translation: a new start for protein synthesis in eukaryotes. *Genes Dev.* 31, 1717–1731.
- Kearse, M.G., Goldman, D.H., Choi, J., Nwaezeapu, C., Liang, D., Green, K.M., Goldstrohm, A.C., Todd, P.K., Green, R., and Wilusz, J.E. (2019). Ribosome queuing enables non-AUG translation to be resistant to multiple protein synthesis inhibitors. *Genes Dev.* 33, 871–885.
- Kelly, K., Cochran, B.H., Stiles, C.D., and Leder, P. (1983). Cell-specific regulation of the c-myc gene by lymphocyte mitogens and platelet-derived growth factor. *Cell* 35, 603–610.
- Kemper, W.M., Berry, K.W., and Merrick, W.C. (1976). Purification and properties of rabbit reticulocyte protein synthesis initiation factors M2Balpha and M2Bbeta. *J. Biol. Chem.* 251, 5551–5557.
- Kim, D., Langmead, B., and Salzberg, S.L. (2015). HISAT: a fast spliced aligner with low memory requirements. *Nat. Methods* 12, 357–360.
- Kozak, M. (1990). Downstream secondary structure facilitates recognition of initiator codons by eukaryotic ribosomes. *Proc. Natl. Acad. Sci. U S A* 87, 8301–8305.

- Kuksa, P.P., Amlie-Wolf, A., Katanić, Ž., Valladares, O., Wang, L.S., and Leung, Y.Y. (2019). DASHR 2.0: integrated database of human small non-coding RNA genes and mature products. *Bioinformatics* 35, 1033–1039.
- Langmead, B., and Salzberg, S.L. (2012). Fast gapped-read alignment with Bowtie 2. *Nat. Methods* 9, 357–359.
- Lee, A.S., Kranzusch, P.J., and Cate, J.H. (2015). eIF3 targets cell-proliferation messenger RNAs for translational activation or repression. *Nature* 522, 111–114.
- Li, W., Xu, H., Xiao, T., Cong, L., Love, M.I., Zhang, F., Irizarry, R.A., Liu, J.S., Brown, M., and Liu, X.S. (2014). MAGeCK enables robust identification of essential genes from genome-scale CRISPR/Cas9 knockout screens. *Genome Biol.* 15, 554.
- Liang, H., He, S., Yang, J., Jia, X., Wang, P., Chen, X., Zhang, Z., Zou, X., McNutt, M.A., Shen, W.H., and Yin, Y. (2014). PTEN $\alpha$ , a PTEN isoform translated through alternative initiation, regulates mitochondrial function and energy metabolism. *Cell Metab.* 19, 836–848.
- Liang, H., Chen, X., Yin, Q., Ruan, D., Zhao, X., Zhang, C., McNutt, M.A., and Yin, Y. (2017). PTEN $\beta$  is an alternatively translated isoform of PTEN that regulates rDNA transcription. *Nat. Commun.* 8, 14771.
- Liu, B., Han, Y., and Qian, S.B. (2013). Cotranslational response to proteotoxic stress by elongation pausing of ribosomes. *Mol. Cell* 49, 453–463.
- Liu, Y., Chen, C., Xu, Z., Scuoppo, C., Rillahan, C.D., Gao, J., Spitzer, B., Bosbach, B., Kastenhuber, E.R., Baslan, T., et al. (2016). Deletions linked to TP53 loss drive cancer through p53-independent mechanisms. *Nature* 537, 471–475.
- Magdolen, V., Klier, H., Wöhl, T., Klink, F., Hirt, H., Hauber, J., and Lottspeich, F. (1994). The function of the hypusine-containing proteins of yeast and other eukaryotes is well conserved. *Mol. Gen. Genet.* 244, 646–652.
- McGlinchy, N.J., and Ingolia, N.T. (2017). Transcriptome-wide measurement of translation by ribosome profiling. *Methods* 126, 112–129.
- Merrick, W.C., and Pavitt, G.D. (2018). Protein synthesis initiation in eukaryotic cells. *Cold Spring Harb. Perspect. Biol.* 10, a033092.
- Meyers, R.M., Bryan, J.G., McFarland, J.M., Weir, B.A., Sizemore, A.E., Xu, H., Dharia, N.V., Montgomery, P.G., Cowley, G.S., Pantel, S., et al. (2017). Computational correction of copy number effect improves specificity of CRISPR-Cas9 essentiality screens in cancer cells. *Nat. Genet.* 49, 1779–1784.
- Mossmann, D., Park, S., and Hall, M.N. (2018). mTOR signalling and cellular metabolism are mutual determinants in cancer. *Nat. Rev. Cancer* 18, 744–757.
- Nagalakshmi, U., Wang, Z., Waern, K., Shou, C., Raha, D., Gerstein, M., and Snyder, M. (2008). The transcriptional landscape of the yeast genome defined by RNA sequencing. *Science* 320, 1344–1349.
- Nandagopal, N., and Roux, P.P. (2015). Regulation of global and specific mRNA translation by the mTOR signaling pathway. *Translation (Austin)* 3, e983402.
- Nogales-Cadenas, R., Carmona-Saez, P., Vazquez, M., Vicente, C., Yang, X., Tirado, F., Carazo, J.M., and Pascual-Montano, A. (2009). GeneCodis: interpreting gene lists through enrichment analysis and integration of diverse biological information. *Nucleic Acids Res.* 37, W317–22.
- Park, M.H., and Wolff, E.C. (2018). Hypusine, a polyamine-derived amino acid critical for eukaryotic translation. *J. Biol. Chem.* 293, 18710–18718.
- Park, M.H., Joe, Y.A., and Kang, K.R. (1998). Deoxyhypusine synthase activity is essential for cell viability in the yeast *Saccharomyces cerevisiae*. *J. Biol. Chem.* 273, 1677–1683.
- Parkin, N., Darveau, A., Nicholson, R., and Sonenberg, N. (1988). cis-acting translational effects of the 5' noncoding region of c-myc mRNA. *Mol. Cell. Biol.* 8, 2875–2883.
- Pavlov, M.Y., Watts, R.E., Tan, Z., Cornish, V.W., Ehrenberg, M., and Forster, A.C. (2009). Slow peptide bond formation by proline and other N-alkylamino acids in translation. *Proc. Natl. Acad. Sci. U S A* 106, 50–54.
- Peil, L., Starosta, A.L., Lassak, J., Atkinson, G.C., Virumäe, K., Spitzer, M., Tenson, T., Jung, K., Remme, J., and Wilson, D.N. (2013). Distinct XPPX sequence motifs induce ribosome stalling, which is rescued by the translation elongation factor EF-P. *Proc. Natl. Acad. Sci. U S A* 110, 15265–15270.
- Pelechano, V., and Alepuz, P. (2017). eIF5A facilitates translation termination globally and promotes the elongation of many non polyproline-specific tripeptide sequences. *Nucleic Acids Res.* 45, 7326–7338.
- Quast, C., Priesse, E., Yilmaz, P., Gerken, J., Schweer, T., Yarza, P., Peplies, J., and Glöckner, F.O. (2013). The SILVA ribosomal RNA gene database project: improved data processing and web-based tools. *Nucleic Acids Res.* 41, D590–D596.
- Roux, P.P., and Topisirovic, I. (2018). Signaling pathways involved in the regulation of mRNA translation. *Mol. Cell. Biol.* 38, e00070–18.
- Saini, P., Eyler, D.E., Green, R., and Dever, T.E. (2009). Hypusine-containing protein eIF5A promotes translation elongation. *Nature* 459, 118–121.
- Sanjana, N.E., Cong, L., Zhou, Y., Cunniff, M.M., Feng, G., and Zhang, F. (2012). A transcription activator-like effector toolbox for genome engineering. *Nat. Protoc.* 7, 171–192.
- Sanjana, N.E., Shalem, O., and Zhang, F. (2014). Improved vectors and genome-wide libraries for CRISPR screening. *Nat. Methods* 11, 783–784.
- Sato, K., Masuda, T., Hu, Q., Tobo, T., Gillaspie, S., Niida, A., Thornton, M., Kuroda, Y., Eguchi, H., Nakagawa, T., et al. (2019). Novel oncogene 5MP1 reprograms c-Myc translation initiation to drive malignant phenotypes in colorectal cancer. *EBioMedicine* 44, 387–402.
- Schnier, J., Schwelberger, H.G., Smit-McBride, Z., Kang, H.A., and Hershey, J.W. (1991). Translation initiation factor 5A and its hypusine modification are essential for cell viability in the yeast *Saccharomyces cerevisiae*. *Mol. Cell. Biol.* 11, 3105–3114.
- Schuller, A.P., Wu, C.C., Dever, T.E., Buskirk, A.R., and Green, R. (2017). eIF5A functions globally in translation elongation and termination. *Mol. Cell* 66, 194–205.e5.
- Scuoppo, C., Miething, C., Lindqvist, L., Reyes, J., Ruse, C., Appelman, I., Yoon, S., Krasnitz, A., Teruya-Feldstein, J., Pappin, D., et al. (2012). A tumour suppressor network relying on the polyamine-hypusine axis. *Nature* 487, 244–248.
- Sears, R.C. (2004). The life cycle of C-myc: from synthesis to degradation. *Cell Cycle* 3, 1133–1137.
- Seibler, J., Kleinriders, A., Küter-Luks, B., Niehaves, S., Brüning, J.C., and Schwenk, F. (2007). Reversible gene knockdown in mice using a tight, inducible shRNA expression system. *Nucleic Acids Res.* 35, e54.
- Sendoel, A., Dunn, J.G., Rodriguez, E.H., Naik, S., Gomez, N.C., Hurwitz, B., Levorse, J., Dill, B.D., Schramek, D., Molina, H., et al. (2017). Translation from unconventional 5' start sites drives tumour initiation. *Nature* 541, 494–499.
- Shalem, O., Sanjana, N.E., Hartenian, E., Shi, X., Scott, D.A., Mikkelsen, T., Heckl, D., Ebert, B.L., Root, D.E., Doench, J.G., and Zhang, F. (2014). Genome-scale CRISPR-Cas9 knockout screening in human cells. *Science* 343, 84–87.
- Shalgi, R., Hurt, J.A., Krykbaeva, I., Taipale, M., Lindquist, S., and Burge, C.B. (2013). Widespread regulation of translation by elongation pausing in heat shock. *Mol. Cell* 49, 439–452.
- Shin, B.S., Katoh, T., Gutierrez, E., Kim, J.R., Suga, H., and Dever, T.E. (2017). Amino acid substrates impose polyamine, eIF5A, or hypusine requirement for peptide synthesis. *Nucleic Acids Res.* 45, 8392–8402.
- Starck, S.R., Tsai, J.C., Chen, K., Shodiya, M., Wang, L., Yahiro, K., Martins-Green, M., Shastri, N., and Walter, P. (2016). Translation from the 5' untranslated region shapes the integrated stress response. *Science* 351, aad3867.
- Tabas-Madrid, D., Nogales-Cadenas, R., and Pascual-Montano, A. (2012). GeneCodis3: a non-redundant and modular enrichment analysis tool for functional genomics. *Nucleic Acids Res.* 40, W478–83.
- Tang, H.L., Yeh, L.S., Chen, N.K., Ripmaster, T., Schimmel, P., and Wang, C.C. (2004). Translation of a yeast mitochondrial tRNA synthetase initiated at redundant non-AUG codons. *J. Biol. Chem.* 279, 49656–49663.

- Tang, L., Morris, J., Wan, J., Moore, C., Fujita, Y., Gillaspie, S., Aube, E., Nanda, J., Marques, M., Jangal, M., et al. (2017). Competition between translation initiation factor eIF5 and its mimic protein 5MP determines non-AUG initiation rate genome-wide. *Nucleic Acids Res.* **45**, 11941–11953.
- Touriol, C., Bornes, S., Bonnal, S., Audigier, S., Prats, H., Prats, A.C., and Vagner, S. (2003). Generation of protein isoform diversity by alternative initiation of translation at non-AUG codons. *Biol. Cell* **95**, 169–178.
- Truitt, M.L., and Ruggero, D. (2016). New frontiers in translational control of the cancer genome. *Nat. Rev. Cancer* **16**, 288–304.
- Tunca, B., Tezcan, G., Cecener, G., Egeli, U., Zorluoglu, A., Yilmazlar, T., Ak, S., Yerci, O., Ozturk, E., Umut, G., and Evrensel, T. (2013). Overexpression of CK20, MAP3K8 and EIF5A correlates with poor prognosis in early-onset colorectal cancer patients. *J. Cancer Res. Clin. Oncol.* **139**, 691–702.
- Tzani, I., Ivanov, I.P., Andreev, D.E., Dmitriev, R.I., Dean, K.A., Baranov, P.V., Atkins, J.F., and Loughran, G. (2016). Systematic analysis of the PTEN 5' leader identifies a major AUU initiated proteoform. *Open Biol.* **6**, 150203.
- Ude, S., Lassak, J., Starosta, A.L., Kraxenberger, T., Wilson, D.N., and Jung, K. (2013). Translation elongation factor EF-P alleviates ribosome stalling at polypyrroline stretches. *Science* **339**, 82–85.
- Ventoso, I., Sanz, M.A., Molina, S., Berlanga, J.J., Carrasco, L., and Esteban, M. (2006). Translational resistance of late alphavirus mRNA to eIF2 $\alpha$  phosphorylation: a strategy to overcome the antiviral effect of protein kinase PKR. *Genes Dev.* **20**, 87–100.
- Woolstenhulme, C.J., Guydosh, N.R., Green, R., and Buskirk, A.R. (2015). High-precision analysis of translational pausing by ribosome profiling in bacteria lacking EFP. *Cell Rep.* **11**, 13–21.
- Yeilding, N.M., Rehman, M.T., and Lee, W.M. (1996). Identification of sequences in c-myc mRNA that regulate its steady-state levels. *Mol. Cell. Biol.* **16**, 3511–3522.
- Zhang, Z., and Dietrich, F.S. (2005). Identification and characterization of upstream open reading frames (uORF) in the 5' untranslated regions (UTR) of genes in *Saccharomyces cerevisiae*. *Curr. Genet.* **48**, 77–87.

## STAR★METHODS

### KEY RESOURCES TABLE

| REAGENT or RESOURCE                                                                   | SOURCE                                          | IDENTIFIER                                                 |
|---------------------------------------------------------------------------------------|-------------------------------------------------|------------------------------------------------------------|
| <b>Antibodies</b>                                                                     |                                                 |                                                            |
| Rabbit monoclonal anti c-Myc (MYC)                                                    | Cell Signaling                                  | Cat# 5605; RRID:AB_1903938                                 |
| Mouse monoclonal anti $\alpha$ -Tubulin                                               | Millipore Sigma                                 | Cat# T6199; RRID:AB_477583                                 |
| Rabbit monoclonal anti eIF5A                                                          | Abcam                                           | Cat# ab32407; RRID:AB_2230904                              |
| Rabbit polyclonal anti DOHH                                                           | Millipore Sigma                                 | Cat# HPA041953; RRID:AB_10795386                           |
| Rabbit polyclonal anti Hypusine                                                       | Millipore Sigma                                 | Cat# ABS1064; RRID:AB_2631138                              |
| Rabbit polyclonal anti phospho-eIF2 $\alpha$                                          | Cell Signaling                                  | Cat# 9721; RRID:AB_330951                                  |
| Rabbit polyclonal anti eIF2 $\alpha$                                                  | Cell Signaling                                  | Cat# 9722; RRID:AB_2230924                                 |
| <b>Chemicals, Peptides, and Recombinant Proteins</b>                                  |                                                 |                                                            |
| FuGENE® HD Transfection Reagent                                                       | Promega Corporation                             | Cat# E2311                                                 |
| Hygromycin B                                                                          | ThermoFisher Scientific                         | Cat# 10687010                                              |
| Puromycin (Puromycin Dihydrochloride)                                                 | ThermoFisher Scientific                         | Cat# A11138-03                                             |
| Polybrene Infection/Transfection Reagent                                              | Millipore Sigma                                 | Cat# TR-1003-G                                             |
| TRIzol                                                                                | ThermoFisher Scientific                         | Cat# 15596026                                              |
| <b>Critical Commercial Assays</b>                                                     |                                                 |                                                            |
| In-Fusion® HD Cloning Kit                                                             | Takara (Clontech)                               | Cat# 639649                                                |
| DNeasy Blood & Tissue Kit                                                             | QIAGEN                                          | Cat# 69504                                                 |
| Agencourt AMPure XP                                                                   | Beckman Coulter Life Sciences                   | Cat# A63882                                                |
| Qubit dsDNA BR Assay Kit                                                              | ThermoFisher Scientific                         | Cat# Q32853                                                |
| Bioanalyzer High Sensitivity DNA Analysis                                             | Agilent                                         | Cat# 5067-4626                                             |
| KAPA Library Quantification Kit for Illumina platforms (KK4835)                       | Kapa Biosystems (Roche)                         | Cat# 07960204001                                           |
| Direct-zol RNA Miniprep Kit                                                           | Zymo Research                                   | Cat# R2051                                                 |
| SuperScript III First-Strand Synthesis SuperMix                                       | SuperScript III First-Strand Synthesis SuperMix | Cat# 18080400                                              |
| SYBR Green PCR Master Mix                                                             | ThermoFisher Scientific                         | Cat# 4309155                                               |
| Lipofectamine RNAiMAX Transfection Reagent                                            | ThermoFisher Scientific                         | Cat# 13778075                                              |
| Phusion® High-Fidelity DNA Polymerase                                                 | New England Biolabs                             | Cat# M0530S                                                |
| QuikChange Lightning Site-Directed Mutagenesis Kit                                    | Agilent                                         | Cat# 210518                                                |
| NEBuilder HiFi DNA Assembly Master Mix                                                | New England Biolabs                             | Cat# E2621S                                                |
| Dual-Luciferase Reporter Assay System                                                 | Promega Corporation                             | Cat# E1910                                                 |
| <b>Deposited Data</b>                                                                 |                                                 |                                                            |
| CRISPR screening data                                                                 | This paper                                      | GEO: GSE132010                                             |
| Raw and processed ribosome profiling data                                             | This paper                                      | GEO: GSE132010                                             |
| RNA-seq data (complementary to ribosome profiling)                                    | This paper                                      | GEO: GSE132010                                             |
| <b>Experimental Models: Cell Lines</b>                                                |                                                 |                                                            |
| HCT116                                                                                | ATCC                                            | CCL-247                                                    |
| HEK293T                                                                               | ATCC                                            | CRL-3216                                                   |
| HCT116 MYC 5' UTR reporter                                                            | This paper                                      | N/A                                                        |
| HCT116 EGFP reporter                                                                  | This paper                                      | N/A                                                        |
| <b>Oligonucleotides</b>                                                               |                                                 |                                                            |
| Sequences of oligonucleotides used in this study provided in <a href="#">Table S3</a> | This paper                                      | N/A                                                        |
| <b>Recombinant DNA</b>                                                                |                                                 |                                                            |
| AAVS1 hPGK-PuroR-pA donor                                                             | Addgene (Rudolf Jaenisch)                       | Plasmid #22072 ( <a href="#">Hockemeyer et al., 2009</a> ) |
| pMSCV-Hygro                                                                           | Clontech                                        | Cat# 634401                                                |

(Continued on next page)

### Continued

| REAGENT or RESOURCE                             | SOURCE                      | IDENTIFIER                                                     |
|-------------------------------------------------|-----------------------------|----------------------------------------------------------------|
| pEGFP-N1                                        | Clontech                    | Cat# 6085-1                                                    |
| pAAVS-EGFP-DONOR                                | This paper                  | N/A                                                            |
| pAAVS-5' UTR-DONOR                              | This paper                  | N/A                                                            |
| Human CRISPR Knockout Pooled Library (GeCKO v2) | Addgene (Feng Zhang)        | Pooled Library #1000000048, #1000000049 (Sanjana et al., 2014) |
| lentiCRISPR v2                                  | Addgene (Feng Zhang)        | Plasmid #52961 (Sanjana et al., 2014)                          |
| psPAX2                                          | Addgene (Didier Trono)      | Plasmid #12260                                                 |
| pMD2.G                                          | Addgene (Didier Trono)      | Plasmid #12259                                                 |
| pGL3-Control                                    | Promega Corporation         | Cat# E1741                                                     |
| pGL3-Control_NP2                                | This paper                  | N/A                                                            |
| pRL-SV40                                        | Promega Corporation         | Cat# E2231                                                     |
| pcDNA3.1(+)                                     | Invitrogen                  | Cat# V790-20                                                   |
| Software and Algorithms                         |                             |                                                                |
| Bowtie2                                         | Langmead and Salzberg, 2012 | N/A                                                            |
| MAGeCK                                          | Li et al., 2014             | N/A                                                            |
| HISAT2                                          | Kim et al., 2015            | N/A                                                            |

### LEAD CONTACT AND MATERIALS AVAILABILITY

Further information and requests for resources and reagents should be directed to and will be fulfilled by the Lead Contact, Joshua Mendell ([joshua.mendell@utsouthwestern.edu](mailto:joshua.mendell@utsouthwestern.edu)). All unique/stable reagents generated in this study are available from the Lead Contact with a completed Materials Transfer Agreement.

### EXPERIMENTAL MODEL AND SUBJECT DETAILS

Cell lines used in this study were obtained from ATCC and confirmed to be free of mycoplasma contamination. HCT116 cells (human) were cultured in McCoy's 5A medium supplemented with 10% fetal bovine serum (FBS) and 1X antibiotic/antimycotic (ThermoFisher). HEK293T cells (human) were cultured in DMEM supplemented with 10% FBS and 1X antibiotic/antimycotic. HCT116 is a male cell line and HEK293T is most likely female due to the presence of multiple X chromosomes and no detectable Y chromosome.

### METHOD DETAILS

#### Construction of MYC-EGFP reporter constructs

The sequences of all oligonucleotides used in this study are provided in Table S3. The following plasmids were obtained: AAVS1 hPGK-PuroR-pA donor (Addgene plasmid #22072), pMSCV-Hygro (Clontech), and pEGFP-N1 (Clontech). First, PGK-Puro was excised from AAVS1 hPGK-PuroR-pA donor by HindIII digestion and replaced with PGK-Hygro (amplified from pMSCV-Hygro with primer pair HM284/HM285) using the In Fusion HD Cloning Kit (Takara) to generate the AAVS1-Donor-PGK-Hygro plasmid. During this cloning, FseI and MluI sites were introduced 5' to the PGK promoter, and Sall, EcoRV and HindIII sites were introduced 3' of the hygromycinB resistance gene. Next, a synthetic polyA signal (Seibler et al., 2007) was synthesized, and inserted downstream of the hygromycinB resistance gene using the Sall and EcoRV sites. Third, the CMV-EGFP-SV40polyA cassette was amplified from pEGFP-N1 (using primer pair HM280/HM281) and cloned into the AAVS1-Donor-PGK-Hygro-pA plasmid using FseI and MluI sites, to generate the AAVS1-Donor-Hygro-EGFP plasmid. Lastly, the EGFP ORF was amplified (using the primer pair HM320/HM321) and cloned back into this vector (AAVS-Donor-Hygro-EGFP) using KpnI and XbaI sites to generate the final EGFP reporter donor vector (pAAVS-EGFP-DONOR). This was done to simplify in-frame cloning upstream of the EGFP ORF in this vector. The MYC 5' UTR was amplified from human genomic DNA (using primers HM322/HM324) and cloned into pAAVS-EGFP-DONOR digested with KpnI using the In Fusion HD Cloning kit to generate the MYC 5' UTR reporter donor plasmid (pAAVS-5' UTR-DONOR). The complete sequence of the MYC 5' UTR used in the reporter construct is provided in Table S3.

#### Generation of clonal fluorescent reporter cell lines

A published TALEN pair targeting the human AAVS1/PPP1R12C locus (Sanjana et al., 2012) was used, in combination with the either pAAVS1-EGFP-DONOR or pAAVS1-5' UTR-DONOR, to generate MYC 5' UTR reporter and EGFP reporter knock-in HCT116 cell

lines. The three plasmids were transfected into HCT116 cells using FugeneHD transfection reagent (Promega), using the following molar ratio: Left TALEN:Right TALEN:Donor vector for homology-directed repair = 1:1:8. Two days post-transfection, the cells were split into 0.5 mg/mL hygromycinB (ThermoFisher Scientific). The cells were selected for at least 7 days, before plating into 96-well plates at single cell density. Colonies arising from single cells were picked and expanded, and genomic DNA was extracted using the DNeasy Blood and Tissue Kit (QIAGEN). Clonal cell lines were then genotyped by PCR to detect the *AAVS1* wild-type and the *EGFP* knock-in alleles, using the primer pairs HM356/HM357 and HM356/HM359 respectively. Heterozygous knock-in clones were used for all experiments.

### Genome-wide CRISPR/Cas9 screening

Fluorescent-reporter coupled CRISPR/Cas9-mediated loss-of-function screening was carried out as previously described in detail (Golden et al., 2017). A brief overview is provided here.

The human GeCKO v2 libraries A and B (Addgene pooled libraries ##1000000048, #1000000049) were amplified in bacteria and purified, and then used to prepare lentivirus in HEK293T cells. Genome-wide screening was performed with libraries A and B in the *MYC* 5' UTR and *EGFP* reporter cell lines, with two replicates for each cell line. Reporter cells were transduced with lentivirus at a multiplicity of infection between 0.2 – 0.4. Two days later, the cells were seeded into 1  $\mu$ g/mL puromycin to select for cells that had been successfully transduced. After passaging for 13 days in puromycin, cells were subjected to FACS on a MoFlo cell sorter (Beckman Coulter). The brightest 0.5% of cells were collected by FACS, pelleted, and frozen at  $-80^{\circ}\text{C}$ .

sgRNA coverage was maintained at 500X during infection and at all subsequent stages of screening.  $120 \times 10^6$  cells were infected per library and at least  $100 \times 10^6$  cells were maintained per library during selection.  $60\text{--}80 \times 10^6$  cells were sorted per replicate per library, and  $1.5 \times 10^5$  –  $2.5 \times 10^5$  cells were collected post sorting.  $40 \times 10^6$  unsorted cells were also pelleted and frozen at  $-80^{\circ}\text{C}$ . Genomic DNA was extracted from the sorted and unsorted cell pellets using either a gDNA isolation method that has been previously described (Golden et al., 2017) for the sorted cells or the DNeasy Blood and Tissue Kit (QIAGEN) for the unsorted cells. Two sequential rounds of PCR were performed using the isolated genomic DNA as template to generate PCR amplicon libraries. Library DNA was then purified using Agencourt AMPure XP beads (Beckman Coulter Life Sciences). DNA concentration of the libraries was quantified by using the Qubit dsDNA BR Assay Kit (ThermoFisher Scientific), as well as by qPCR using the KAPA Library Quantification Kit for Illumina platforms (Kapa Biosystems). Amplicon library size and integrity were also assessed via the Bioanalyzer High Sensitivity DNA Analysis Kit (Agilent). Following these quality checks, library amplicons were sequenced on an Illumina NextSeq500 with 75 bp single-end reads. Approximately  $20 \times 10^6$  reads were obtained per sample.

### Knockout of genes via lentiviral delivery of CRISPR/Cas9 components

#### Generation of lentivirus

sgRNAs targeting genes of interest, as well as non-target (NT) sgRNAs (Table S3), were cloned into the lentiCRISPRv2 (LCv2) vector (Addgene plasmid #52961) according to the LCv2 cloning protocol (Shalem et al., 2014). LCv2-sgRNA lentivirus was generated in HEK293T cells as follows: Cells were seeded at a density of 600,000 cells per well of a 6-well dish. The next day, cells were transfected with 0.5  $\mu$ g LCv2-sgRNA plasmid, 0.3  $\mu$ g psPAX2 (Addgene #12260), and 0.2  $\mu$ g pMD2.G (Addgene #12259) lentiviral packaging plasmids using FugeneHD transfection reagent (Promega). Media was changed 24 hours post-transfection, and viral collection was performed on the two subsequent days. Media containing virus was filtered through a 0.45  $\mu$ m SFCA sterile filter and either utilized immediately for transduction or frozen at  $-80^{\circ}\text{C}$  in single use aliquots.

#### Infection of cells and generation of knockout pools

Cells to be infected were seeded in an equal mix of fresh media and viral supernatant with polybrene (EMD Millipore) at a final concentration of 8  $\mu$ g/ml. Cells were infected at densities such that they achieved confluency 48 hours post-transduction. Media was changed the day after infection and cells were split into media containing puromycin at a concentration of 1  $\mu$ g/ml 48 hours after infection.

For all experiments using *EIF5A*<sup>-/-</sup> and *DOHH*<sup>-/-</sup> pools, cells transduced with the appropriate LCv2-sgRNA virus were harvested for analysis after 6 days of selection in puromycin. Control pools used in these experiments were cells transduced with LCv2-NT sgRNA virus, selected in puromycin for 6 days and harvested in the same manner as *EIF5A*<sup>-/-</sup> and *DOHH*<sup>-/-</sup> knockout pools.

### Genome editing of the MYC1 initiation codon

#### Generation of MYC1 knockout pools and siRNA transfection

HCT116 cells were infected with lentiCRISPRv2 virus selectively targeting MYC1 (sgRNA sequence listed in Table S3) and selected in puromycin as described above. On the third day of selection, cells infected with MYC1 sgRNA and NT sgRNA were reverse transfected with siRNA (either targeting *EIF5A*, or NT controls listed in Table S3, Dharmacon) at a concentration of 20 nM, using Lipofectamine RNAiMAX (Thermo Fisher Scientific) according to the manufacturer's instructions. Cells were harvested for gDNA isolation and western blot analysis at 72 hours post-transfection of siRNA (corresponding to 6 days of puromycin selection).

#### Genotyping of MYC1-sgRNA targeting site by next-generation sequencing

Cells infected with lentiCRISPR-MYC1 sgRNA or lentiCRISPR-NT sgRNA and then transfected with NT siRNA were harvested for genomic DNA isolation using the DNeasy Blood and Tissue Kit (QIAGEN). Amplicon libraries (of the sgRNA target site) were generated by two sequential rounds of PCR using Phusion High-Fidelity DNA Polymerase (NEB). PCR1 was performed using gene specific

primers HM685/HM686, and PCR2 was performed using Illumina TruSeq CD Indexes D508 (Fwd)/D706-709 (Rev). Amplicons were sequenced using a MiSeq instrument with at least 100,000 reads per sample.

### Western blot analysis

Cell lysates were prepared by harvesting in ice cold 1X RIPA buffer. Proteins were visualized and signals were quantified using an infrared fluorescent antibody detection system (LI-COR). Blocking was performed in 10% BSA for phospho-antibodies or 10% non-fat milk for all other antibodies. Primary antibodies were utilized at a concentration of 1:1000, diluted in 5% BSA in TBST (for phospho-antibodies) or 5% non-fat milk in TBST (for all other antibodies), and are listed in the Key Resources table.

### RNA isolation and qRT-PCR

Cells at subconfluent densities were harvested in Trizol (Thermo Fisher Scientific). RNA was isolated using the Direct-zol RNA mini-prep kit (Zymoresearch). The on-column DNase digestion step was performed according to manufacturer's instructions. SuperScript III First-strand Synthesis SuperMix (Thermo Fisher Scientific) was used to synthesize cDNA from RNA, using 1  $\mu$ g of RNA per reaction. All qPCR assays were performed in technical triplicate, using the SybrGreen 2X PCR Master Mix (Applied Biosystems). Primers used for qRT-PCR are listed in [Table S3](#).

### Ribosome profiling

HCT116 cells were transduced with lentiCRISPRv2 virus targeting *EIF5A* or *DOHH*, or expressing NT sgRNA, and selected for 6 days in puromycin as described above to generate knockout pools. Cells were harvested and ribosome profiling was performed exactly as described ([McGlinchy and Ingolia, 2017](#)), with the following modifications:

1. Ribosome footprints were size selected by gel electrophoresis as described previously ([Ingolia et al., 2012](#)), and fragments between 24-35nt were excised for library preparation.
2. Samples were not pooled after linker ligation, and the subsequent steps were performed individually for each sample.
3. In order to effectively separate 3' linker-ligated RNA fragments from unligated linker, we utilized gel electrophoresis, followed by gel extraction as previously described ([Ingolia et al., 2012](#)), instead of an enzymatic depletion.

### Arsenite treatment

800,000 HCT116 cells were seeded in each well of a 6-well dish. The following day, the cells were treated with 250  $\mu$ M sodium arsenite for up to 3 hours. Cells were then harvested and analyzed by western blotting as described above.

### Luciferase reporter assays

#### Construction of luciferase reporters

The firefly luciferase ORF in pGL3-Control (Promega) was first modified to remove N-terminal/proximal pause sites. A proline-glycine dipeptide (aa 37-38) and a proline-proline dipeptide (aa 173-174) were mutated to proline-alanine using the QuikChange Lightning Site-Directed Mutagenesis Kit (Agilent) and the primer pairs HM673/HM674 and HM677/HM678, respectively, to generate pGL3-Control\_NP2. *MYC* 5' UTR reporter fragments were then cloned into the HindIII and NcoI sites in pGL3-Control\_NP2 using the NEBuilder HiFi DNA Assembly Master Mix (NEB). The *MYC* 5' UTR reporter fragments used in the assembly were designed to contain a fragment of the *MYC* transcript beginning 15 nt upstream of the *MYC*1 CUG initiation codon and extending 201 nt downstream of the *MYC*2 AUG initiation codon into the main *MYC* ORF (as depicted in [Figure 4B](#)), followed by a P2A sequence. The *MYC*2 initiation codon was mutated from AUG to a non-initiating UUU in all constructs. The frameshifted reporter was generated by introducing a single nucleotide deletion 6 aa upstream of the PPA pause motif. Appropriate homology arms to facilitate HiFi assembly were added and fragments were obtained as gBlocks synthesized by IDT (sequences provided in [Table S3](#)).

*PLOD3* 5' UTR luciferase reporter constructs were designed and constructed in a manner similar to the *MYC* 5' UTR luciferase reporters. Fragments of the *PLOD3* transcript containing the entire *PLOD3* 5' UTR and a small segment of the ORF were synthesized as gene fragments and cloned into a plasmid vector by Genewiz (sequences provided in [Table S3](#)). Synthesized fragments were then amplified using primers that added a left homology arm, and a P2A element and a homology arm on the right to facilitate cloning into pGL3-Control\_NP2 using the NEBuilder HiFi DNA Assembly Master Mix (NEB) at HindIII and NcoI sites, as described above. Three *PLOD3* constructs that each reported translation in a different reading frame were generated by synthesizing segments of the *PLOD3* transcript that differed in length by one nucleotide (the first 498, 499, or 500 nucleotides of the transcript) and fusing them to the P2A-luciferase cassette. In each reporter, all stop codons contained within the *PLOD3* transcript segments that were in the same reading frame as the luciferase ORF were mutated to alanine codons to ensure productive read out of translation. Further, the AUG start codon (contained in the Frame 1 construct) was mutated to the non-initiating UUU. Lastly, a luciferase reporter containing the unaltered AUG start codon (and similar to the Frame 1 reporter in all other respects) was generated to use as a control to monitor canonical AUG translation. Primers used for amplifying the *PLOD3* fragments were as follows (sequences provided in [Table S3](#)): Frame 1 – HM705/HM706; Frame 2 – HM705/HM707; Frame 3 – HM705/HM710; ATG-Control – HM705/HM706.)

### Dual luciferase reporter assays

HCT116 cells were infected with lentiCRISPRv2 virus containing *EIF5A*-targeting or NT sgRNAs as described above. On the fourth day of selection in puromycin, cells were plated in 24-well dishes at densities such that they would be 50% confluent in 24 hours. The following day, cells were transfected with luciferase reporters using FugeneHD transfection reagent (Promega). 300 ng of DNA was transfected/well, comprising 2 ng of pRL-SV40 (Promega) as a transfection control, 198 ng of empty pcDNA3.1(+) (Invitrogen), and 100 ng of a pGL3-5' UTR reporter. Cells were harvested 24 hours later and luciferase activity was measured with the Dual-Luciferase Reporter Assay System (Promega).

## QUANTIFICATION AND STATISTICAL ANALYSIS

### Analysis of genome-scale CRISPR/Cas9 screening data

The GeCKO v2 library sgRNA reference files were obtained from Addgene and identical sgRNAs targeting more than one gene were removed. Bowtie 2 was used to map reads obtained from the demultiplexed FASTQ files to the modified reference library, allowing no mismatches, and normalized read counts were calculated as described previously (Shalem et al., 2014). MAGeCK was used to identify statistically significant hits from the screening data (Li et al., 2014). We detected contaminating reads in the library corresponding to sgRNAs targeting *NFE2L2* (arising from cloning of individual sgRNAs into the LCv2 vector) and this gene was therefore removed from our analysis.

### Bioinformatic analysis of ribosome profiling data

#### Read preparation and mapping

For analysis of reads from the human ribosome profiling dataset, reads from two separate sequencing runs for each sample were first combined. Next, the adaptor, inline barcode, and the random-mer incorporated into the library amplicon were trimmed for each read. Then, reads from noncoding RNAs were removed by mapping to known rRNA (Quast et al., 2013), tRNA (Chan and Lowe, 2016), and snRNA (Kuksa et al., 2019) sequences using HISAT2 (Kim et al., 2015). Reads that did not map to these databases were subsequently mapped to the human reference genome (GRCh38) (Frankish et al., 2019) using HISAT2. Reads with lengths between 24 – 31 nt were used for all analyses. Annotation of transcripts was based on GENCODE v27 (Frankish et al., 2019) and for each gene with multiple isoforms, the longest transcript was used.

Reads from yeast ribosome profiling data were processed as follows: First, the adaptor was trimmed for each read. Reads with quality score less than 20 at any position or that mapped to known noncoding RNAs were removed. The remaining reads were then mapped to the yeast reference genome (Engel et al., 2014) using HISAT2. Only reads between 25 – 34 nt were used for subsequent analyses. Annotation of transcripts was based on a published dataset (Nagalakshmi et al., 2008).

#### Periodicity analysis (Figure S3)

For each mapped read in the human dataset, the codon occupying the P-site of the ribosome was defined as nucleotides 13–15 from the 5' end of the mapped read. This offset length was calculated by identifying the modal distance between the 5' end of reads mapped to annotated translation start sites and the corresponding AUG start codons. Ribosome occupancy at each position was calculated by determining the number of reads whose 5' ends mapped 12 nt upstream, and thus represented P-site occupancy of the ribosome in all analyses. The numbers of reads at each position (corresponding to P-site ribosome occupancy at that position) were normalized to the total number of mapped reads per sample (in millions) to yield reads per million mapped reads (RPM). Normalized read counts (RPM) at each position were aggregated across all transcripts to generate periodicity plots.

#### Meta-codon plots (Figures 2C and 2G)

Proline-proline (PP) motifs from all coding sequence (CDS) regions were considered, and those with another PP motif located within 50 nt upstream were discarded. RPM values were aggregated at each position within a 100 nt region centered on PP motifs and the values at the first nucleotide of each codon (corresponding to in-frame reads) were plotted.

A similar analysis was performed to generate a meta-codon plot centered on the top 20 tripeptide pause motifs in *EIF5A*<sup>−/−</sup> cells compared to sgNT. Identification of those tripeptides is described below.

#### Pause motif analysis (Figures 2D–2F)

Genes whose CDS fulfilled a minimum coverage requirement of at least 128 reads in each replicate of each sample were used in this analysis of human ribosome profiling data. The first 100 nt and the last 100 nt of the CDS were excluded from consideration in pause motif calculations. The ratio of average ribosome occupancy at each codon triplet (tripeptide motif) to average ribosome occupancy of the CDS was calculated and defined as the pause score. The average pause score for each tripeptide motif across all considered CDSs was calculated. Tripeptides that occurred > 50 times in the considered CDSs, and whose average pause score in *EIF5A*<sup>−/−</sup> samples was > 3 in both replicates (listed in Figure 2F) were used to construct a position weighted matrix, where tripeptides were weighted by the ratio of their average pause score in *EIF5A*<sup>−/−</sup> to sgNT. An identical analysis was performed to identify a tripeptide pause motif signature in *DOHH*<sup>−/−</sup> cells.

#### CDF plots (Figures 2A, 2B, 3A, 3C, S4B, 5B–5D, and S5B–S5D)

For reads obtained from yeast ribosome profiling data, the 15<sup>th</sup> nucleotide from the 3' end was defined as the first nucleotide of the P-site codon (offset calculated from reads mapping to annotated start codons, as described above). For both human and yeast datasets, reads were assigned to the 5' UTR or CDS based on the location of the calculated P-site. Reads whose P-site mapped 3 nt

upstream or downstream of the start codon were not utilized for these analyses. Reads per kilobase per million mapped reads, or RPKM, was used to represent ribosome occupancy of a 5' UTR or CDS.

For CDF plots generated from human ribosome profiling data comparing *EIF5A*<sup>-/-</sup> to sgNT, genes that were covered by at least 128 reads in the RNA-seq experiment in both sgNT or in both *EIF5A*<sup>-/-</sup> samples, and that additionally fulfilled the following coverage criteria were used in the analysis: For plots calculating CDS ribosome occupancy, genes covered by at least 128 reads in the CDS in both sgNT samples or in both *EIF5A*<sup>-/-</sup> samples were included. For CDF plots calculating 5' UTR translation, genes whose 5' UTRs were covered by at least 16 reads in both sgNT samples or in both *EIF5A*<sup>-/-</sup> samples were included. Similar coverage requirements were applied when comparing *DOHH*<sup>-/-</sup> to sgNT samples. For CDF plots comparing *EIF5A* knockdown (KD) to WT yeast, genes whose CDS was covered by at least 64 reads in both WT or in both *EIF5A* KD samples, and genes whose 5' UTRs were covered by at least 6 reads in both WT or both *EIF5A* KD samples were included.

#### DATA AND CODE AVAILABILITY

All high-throughput sequencing data generated in this study (CRISPR screening, RNA-seq, and ribosome profiling) have been deposited in GEO under accession GEO: GSE132010.

**Cell Reports, Volume 29**

**Supplemental Information**

**Suppression of Ribosomal Pausing  
by eIF5A Is Necessary to Maintain  
the Fidelity of Start Codon Selection**

**Hema Manjunath, He Zhang, Frederick Rehfeld, Jaeil Han, Tsung-Cheng Chang, and Joshua T. Mendell**

**A**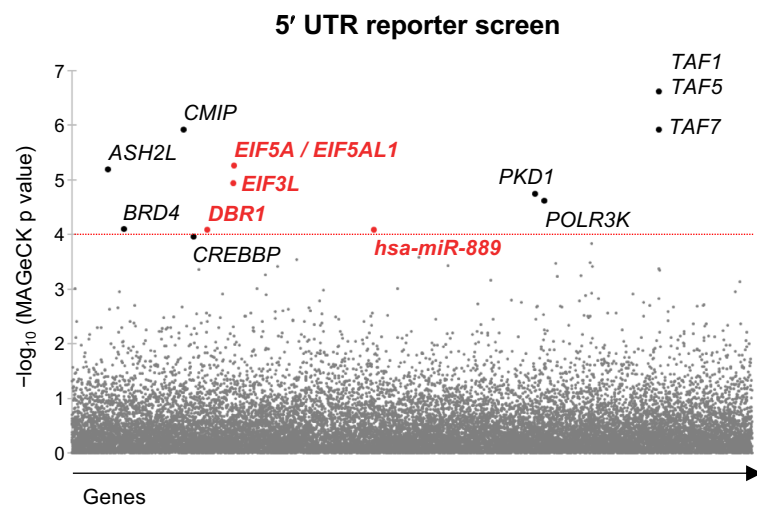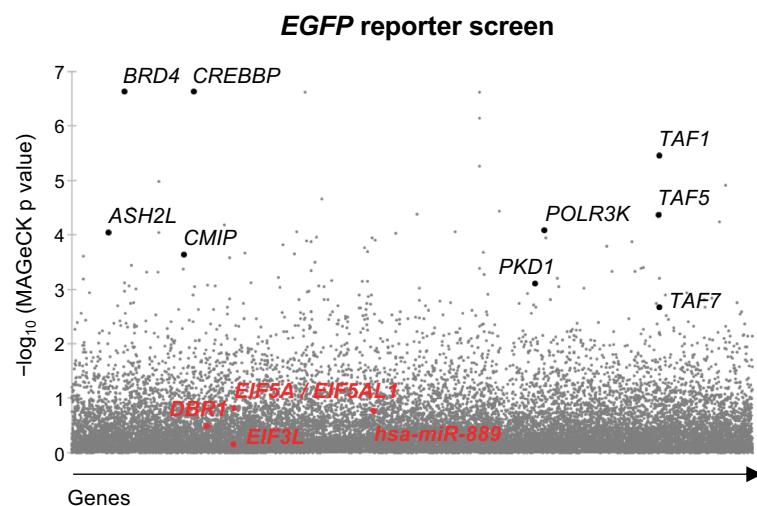**B**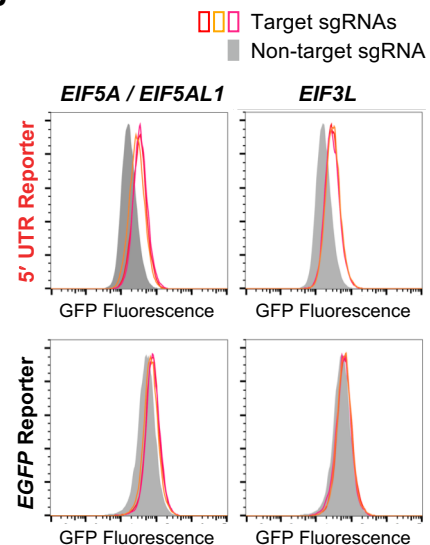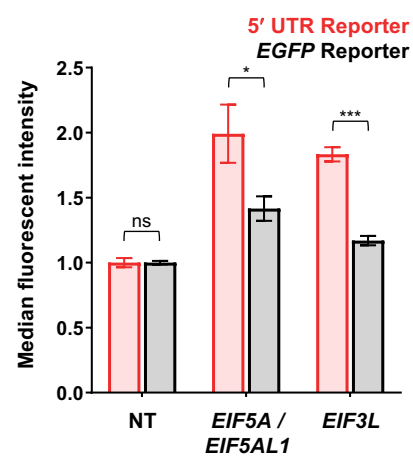**C**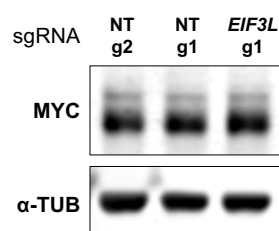**D**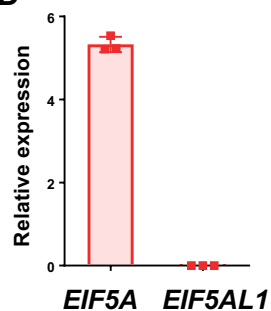**E**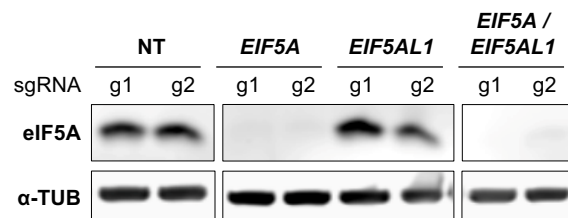**F**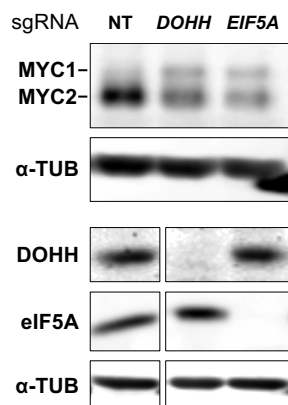

**Figure S1. Analysis and validation of CRISPR/Cas9 screening data, Related to Figure 1**

(A) MAGECK analysis of screening data from *MYC* 5' UTR reporter cells (top) and *EGFP* control reporter cells (bottom). 5' UTR-specific hits marked in red, common hits marked in black.

(B) 5' UTR and *EGFP* control reporter expression assessed by flow cytometry after lentiviral delivery of Cas9 and individual sgRNAs targeting *EIF5A/EIF5AL* or *EIF3*.

(C) Western blot analysis of MYC protein levels in HCT116 cells after lentiviral delivery of Cas9 and non-target (NT) or *EIF3L*-targeting sgRNAs.

(D) qRT-PCR analysis of *EIF5A* and *EIF5AL1* expression, normalized to 18s rRNA, in HCT116 cells. n = 3 biological replicates.

(E) Western blot analysis of eIF5A protein levels in HCT116 cells after lentiviral delivery of Cas9 and sgRNAs that target only *EIF5A*, only *EIF5AL1*, or both genes.

(F) Western blot analysis of the indicated proteins in HEK293T cells after lentiviral delivery of Cas9 and sgRNAs.

Error bars represent S.D. \*p<0.05, \*\*\*p<0.001, calculated by two-tailed Welch's t-test.

**A**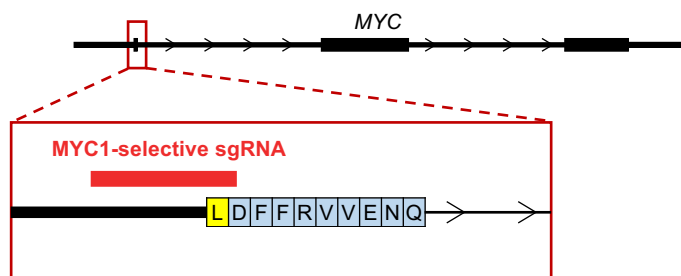**B**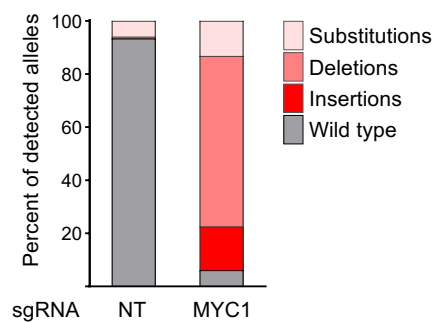**C**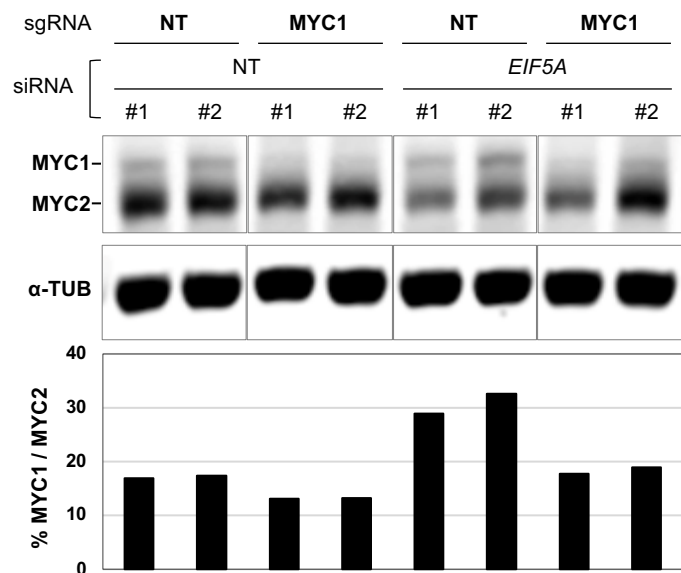**D**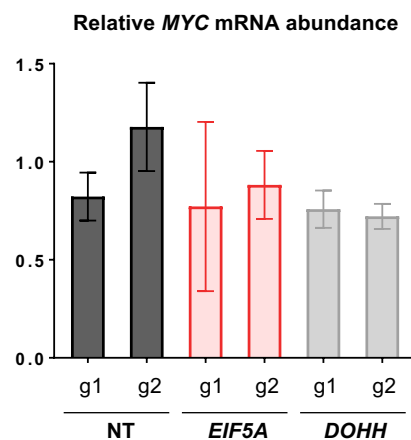**E**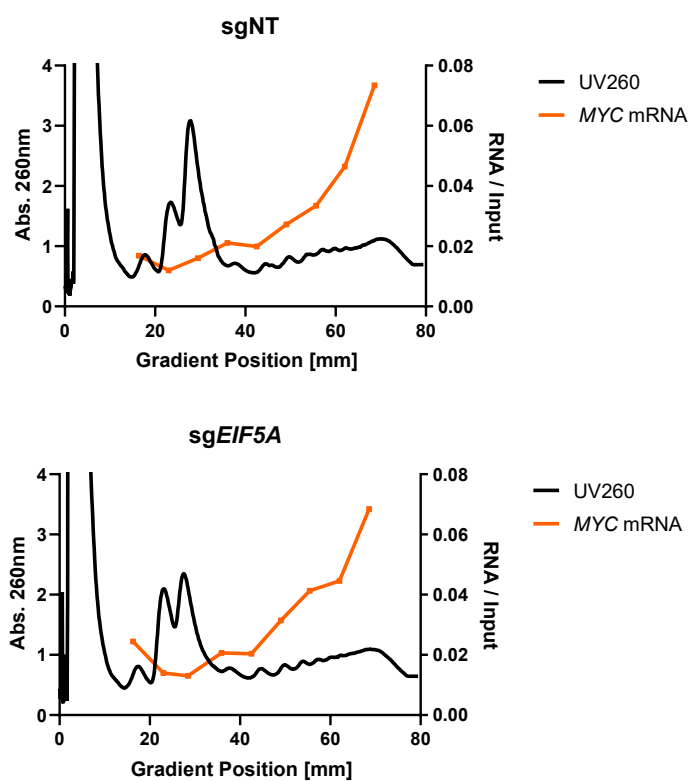**F**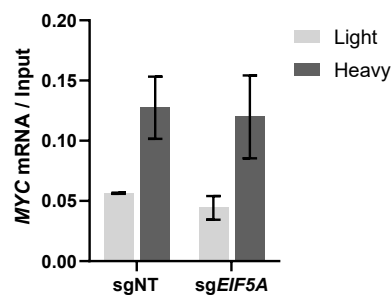**G**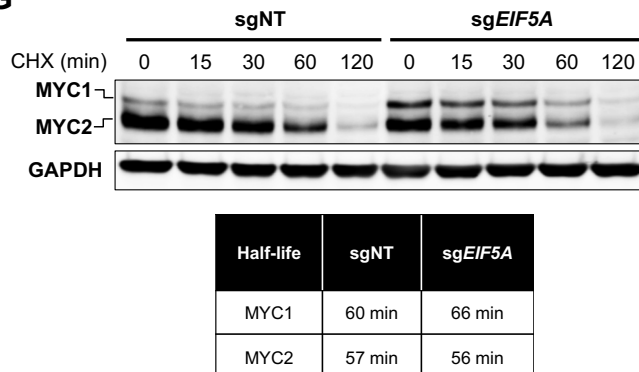

## Figure S2. Additional analyses of *MYC* mRNA and protein, Related to Figure 1

(A) Schematic of the *MYC1*-targeting sgRNA.

(B) HCT116 cells were transduced with lentiviral vectors encoding Cas9 and either the *MYC1*-selective or non-targeting sgRNAs. The *MYC1* sgRNA target site was amplified and the frequency of indels in the population was determined by high throughput sequencing (>100,000 reads obtained for each condition).

(C) Western blot analysis of *MYC* protein in HCT116 cells following introduction of control or *MYC1*-targeting sgRNAs followed by transfection with control or *EIF5A*-targeting siRNAs. Quantification of *MYC1* as a percentage of *MYC2* is shown.

(D) qRT-PCR analysis of *MYC* transcript levels in *EIF5A*<sup>-/-</sup> and *DOHH*<sup>-/-</sup> HCT116 cells. Data represented as mean ± S.D. (n = 2 biological replicates per sgRNA).

(E) Representative polysome association of *MYC* mRNA in HCT116 cells infected with lentivirus encoding control sgRNA (sgNT) or sgRNA targeting *EIF5A* (sg*EIF5A*). Cell lysates were separated on 5-50% linear sucrose gradients. Ultraviolet (UV) absorbance at 260 nm was measured to assess ribosome distribution along the gradient (black line). *MYC* mRNA levels in nine gradient fractions were measured by qRT-PCR and normalized to the input RNA (orange line).

(F) *MYC* mRNA association with light (sum of fractions 3-5) and heavy (sum of fractions 7-9) polysomes was not significantly altered upon *EIF5A* loss. Data represented as mean ± S.E.M. (n = 2 biological replicates per sgRNA).

(G) *MYC1* and *MYC2* protein half-lives were determined in control (sgNT) or *EIF5A* knockout (sg*EIF5A*) HCT116 cells by treating with 50 mg/mL cycloheximide (CHX) and determining protein abundance at the indicated time-points by western blotting.

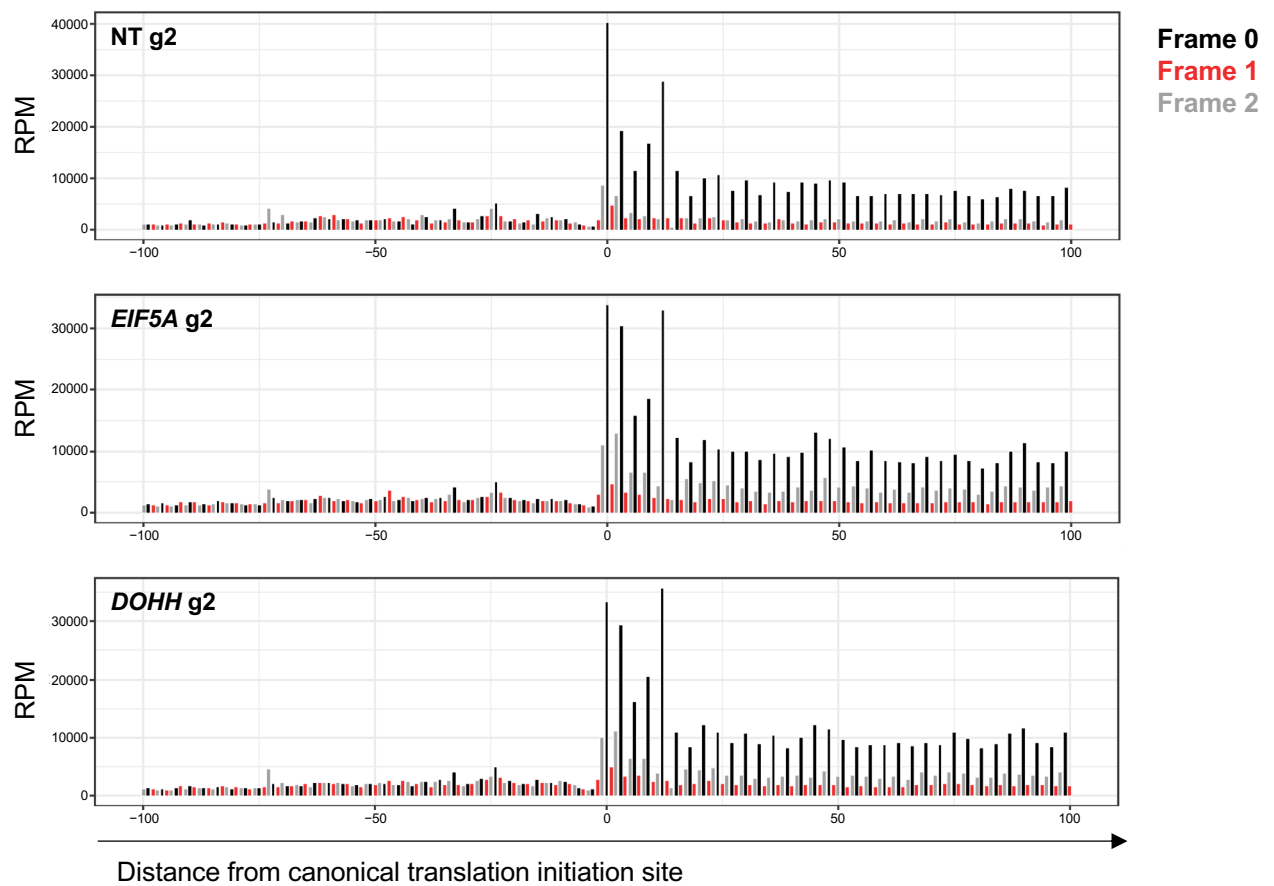

**Figure S3. Periodicity of ribosome profiling sequencing reads, Related to Figure 2**

Periodicity of ribosome profiling reads visualized by meta-codon plots centered on canonical AUG start codons. Representative samples shown.

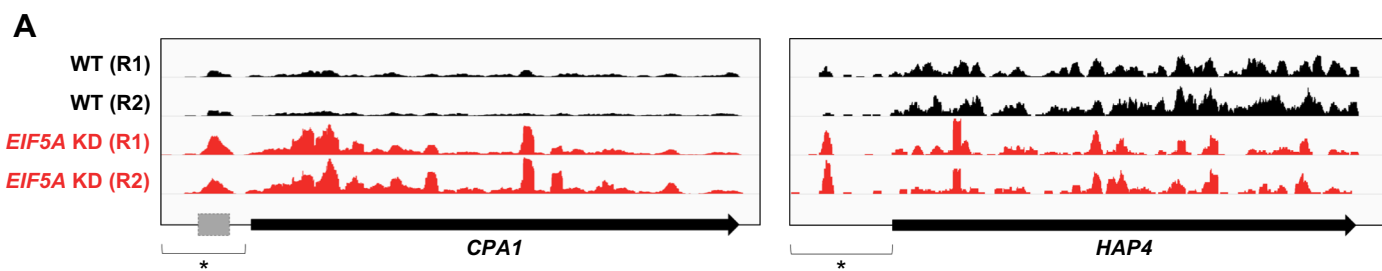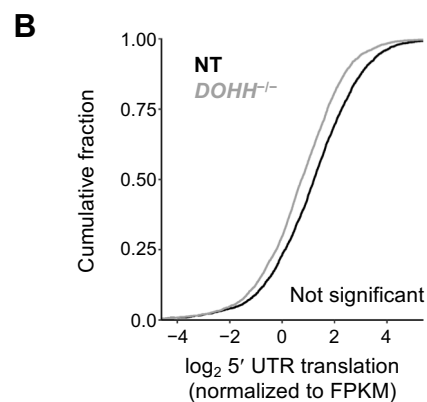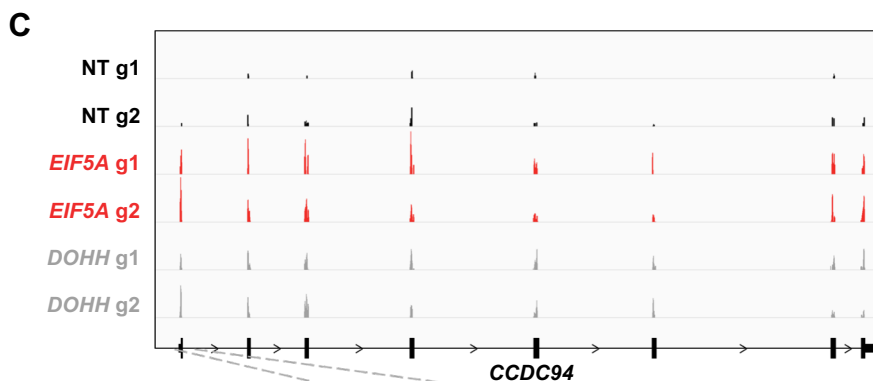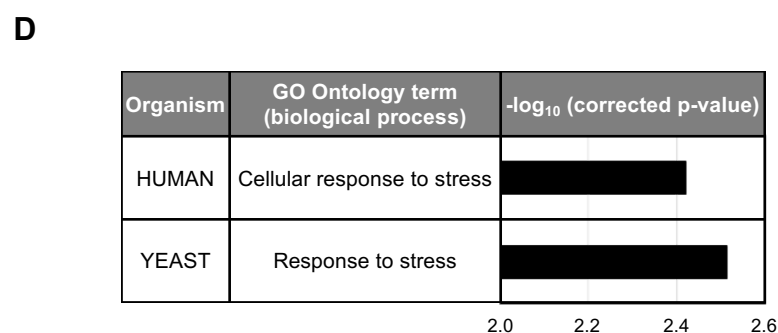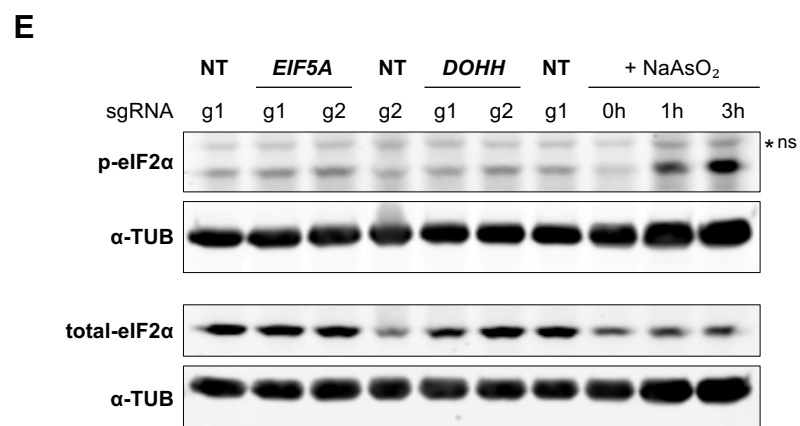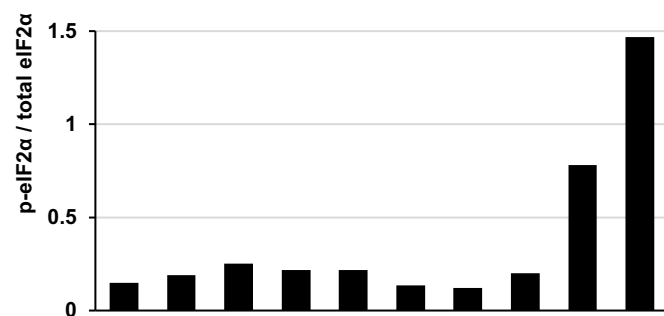

**Figure S4. Loss of function of eIF5A increases upstream translation initiation, Related to Figure 3**

(A) Ribosome occupancy on the yeast *CPA1* and *HAP4* transcripts in *EIF5A* KD and WT yeast. Region of upstream translation marked with an asterisk. Previously reported uORF in *CPA1* denoted by grey box (Zhang and Dietrich, 2005).

(B) CDF plot of 5' UTR translation in *DOHH*<sup>-/-</sup> and control sgNT HCT116 cells. 5' UTR translation defined as ribosome occupancy (RPKM) in 5' UTR normalized to transcript expression level derived from RNA-seq (FPKM) (3113 genes included based on minimal coverage criteria).

(C) Ribosome occupancy on the human *CCDC94* transcript in *EIF5A*<sup>-/-</sup>, *DOHH*<sup>-/-</sup>, and control sgNT cells. Region of upstream translation marked with an asterisk.

(D) Enrichment of stress response genes among transcripts that show increased 5' UTR translation in eIF5A-deficient human and yeast cells. Human gene ontology (GO) analysis performed with the DAVID functional annotation tool (Huang et al., 2008; Sherman et al., 2008); yeast analysis performed using the Genecodis webtool (Carmona-Saez et al., 2007; Nogales-Cadenas et al., 2009; Tabas-Madrid et al., 2012).

(E) Serine 51-phosphorylated eIF2 $\alpha$  (p-eIF2 $\alpha$ ) and total eIF2 $\alpha$  levels in *EIF5A*<sup>-/-</sup> and *DOHH*<sup>-/-</sup> HCT116 cells monitored by Western blot. Sodium arsenite (NaAsO<sub>2</sub>)-treatment served as a positive control. Asterisk indicates non-specific band recognized by the anti-p-eIF2 $\alpha$  antibody.

**A**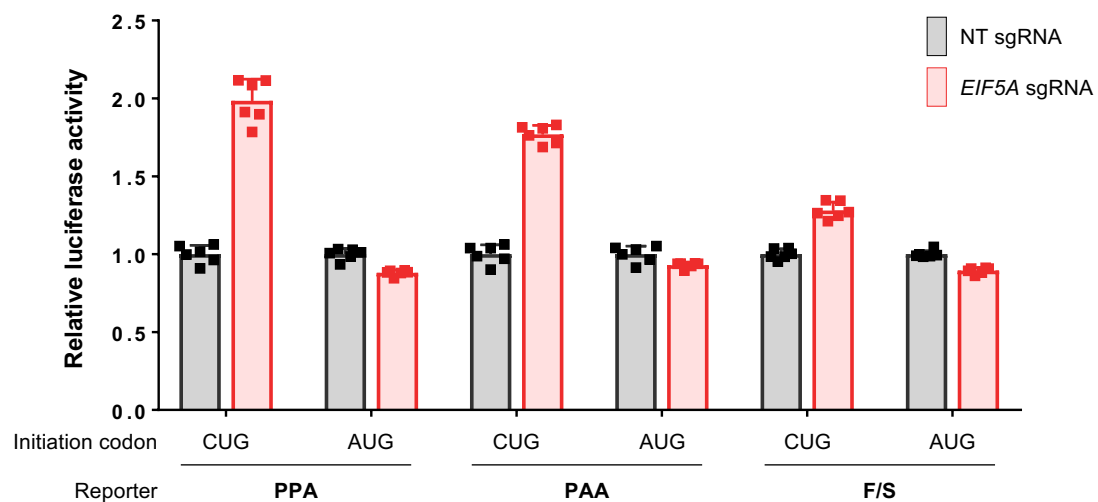**B**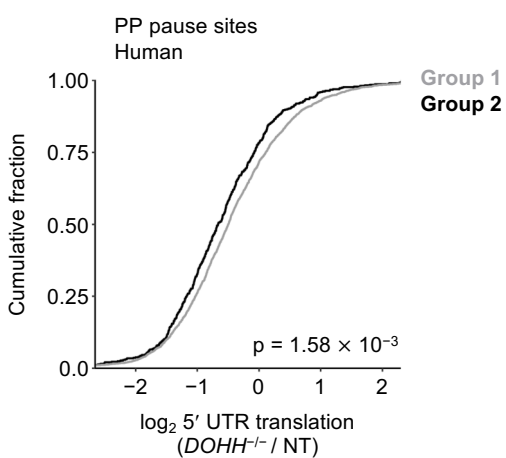**C**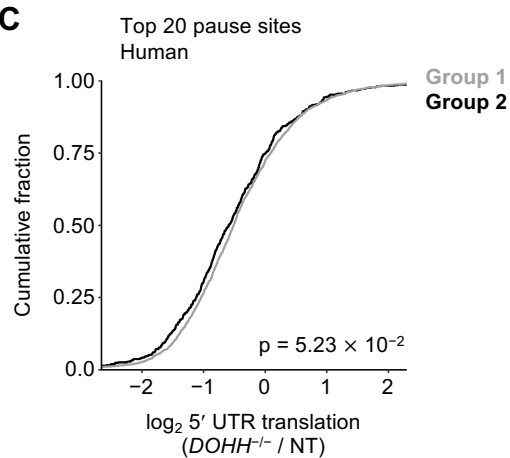**D**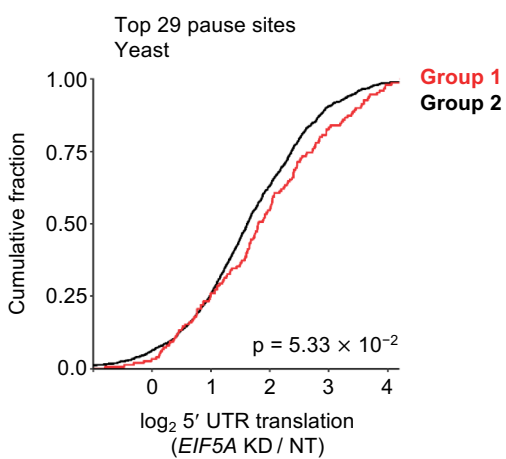

**Figure S5. Proximal ribosome pausing promotes upstream translation on the *MYC* transcript, and broadly throughout the transcriptome, Related to Figures 4 and 5**

(A) Activity of the individual CUG-initiated or AUG-initiated *MYC* reporter constructs used in Figure 4B. Following transfection of reporters into *EIF5A*<sup>-/-</sup> or control sgNT HCT116 cells, firefly luciferase activity was normalized to co-transfected renilla luciferase. Data represented as mean  $\pm$  S.D. (n = 6 biological replicates).

(B-C) CDF plots of 5' UTR translation in *DOHH*<sup>-/-</sup> cells compared to sgNT control, with pause sites defined as PP dipeptides (B), or the top 20 tripeptide pause motifs identified in *EIF5A*<sup>-/-</sup> cells compared to sgNT control (C). 5' UTR translation defined as ribosome occupancy (RPKM) in 5' UTR normalized to transcript expression level derived from RNA-seq (FPKM). Genes included based on minimal coverage requirements: 2589 in Group 1 and 524 in Group 2 for (B); 2570 in Group 1 and 543 in Group 2 for (C).

(D) CDF plot of 5' UTR translation in *EIF5A* KD yeast compared to WT. Pause sites defined as the top 29 tripeptide pause motifs identified in *EIF5A* KD yeast (Schuller et al., 2017). 5' UTR translation defined as normalized ribosome occupancy (RPKM) in 5' UTR / CDS. 150 genes included in Group 1 and 1188 genes included in Group 2 based on minimal coverage criteria.
